# Supplementary material for: Enhancement of Energy Transfer Efficiency with Structural Control of Multichromophore Light‐Harvesting Assembly
Source: PubMed Central journal article supplement (PMC7578888; doi:10.1002/advs.202001623), 2020-08-19
Supplement: ADVS-7-2001623-s001.pdf [file ADVS-7-2001623-s001.pdf]

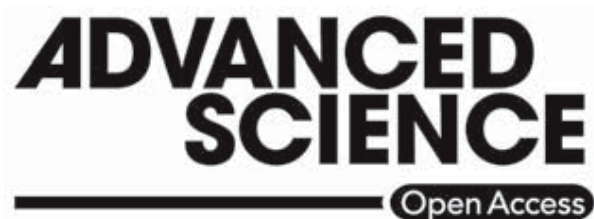

## Supporting Information

for *Adv. Sci.*, DOI: 10.1002/advs.202001623

### Enhancement of Energy Transfer Efficiency with Structural Control of Multichromophore Light-Harvesting Assembly

*Inhwan Oh, Hosoowi Lee, Tae Wu Kim, Chang Woo Kim, Sunhong Jun, Changwon Kim, Eun Hyuk Choi, Young Min Rhee, Jeongho Kim,\* Woo-Dong Jang,\* and Hyotcherl Ihee\**

## Supporting Information

### **Enhancement of Energy Transfer Efficiency with Structural Control of Multi-Chromophore Light-Harvesting Assembly**

*Inhwan Oh, Hosoo Lee, Tae Wu Kim, Chang Woo Kim, Sunhong Jun, Changwon Kim, Eun Hyuk Choi, Young Min Rhee, Jeongho Kim,\* Woo-Dong Jang,\* and Hyotcherl Ihee\**

#### **Table of contents**

SI Note 1. Synthesis and characterization of multi-porphyrin dendrimers

SI Note 2. Steady-state absorption/emission spectra of multi-porphyrin dendrimers

SI Note 3. Molecular dynamics simulations for multi-porphyrin dendrimers.

SI Note 4. Experimental determination of FRET efficiencies in multi-porphyrin dendrimers

SI Note 5. Excitation power dependence of TA signals

SI Note 6. Calculation of theoretical FRET efficiencies in multi-porphyrin dendrimers

SI Note 7. Enhancement of FRET efficiency in the model MCSs examined with simulations

SI Note 8. Enhancement of FRET efficiency dependent on normalized D-A distance

SI Note 9. Comparison with previous studies

SI Note 10. Principle for prediction of FRET efficiency for multi-chromophore systems

SI Figures

SI References

**SI Note 1. Synthesis and characterization of multi-porphyrin dendrimers****Materials and measurements**

All commercially available chemicals were reagent grade purchased from Sigma-Aldrich, TCI, and Alfa Aesar and used without further purification. Air-/water-sensitive reagents were treated under nitrogen atmosphere with anhydrous condition. Preparative recycling size exclusion chromatography (SEC) was performed on JAI model LC9021 equipped with JAIGEL-1H, JAIGEL-2H and JAIGEL-3H columns using  $\text{CHCl}_3$  (HPLC grade / J.T. Baker) as an eluent.  $^1\text{H}$  and  $^{13}\text{C}$  NMR spectroscopy was performed on a Bruker Avance DPX 400 spectrometer at ambient temperature. Matrix-assisted-laser-desorption-ionization time-of-flight mass (MALDI TOF MS) spectrometry was performed a Bruker Daltonics LRF20 mass spectrometer with dithranol (1,8,9-trihydroxyanthracene) as a matrix.

**Synthesis and characterization**

Some of compounds, such as  $(\text{OMe})_6(\text{OH})_2\text{P}_{\text{FB}}$ ,  $(\text{OMe})_8\text{P}_{\text{FB}}$ ,  $(\text{OH})_8\text{P}_{\text{FB}}$ , **P1**, **P2**, **P3**, **P5**, **SD4A**, and **SD16A**, were synthesized according to the previously reported methods.<sup>1</sup> *Cis*- $(\text{OMe})_4(\text{OH})_4\text{P}_{\text{FB}}$  and *trans*- $(\text{OMe})_4(\text{OH})_4\text{P}_{\text{FB}}$  were synthesized with the same synthetic procedure as  $(\text{OMe})_6(\text{OH})_2\text{P}_{\text{FB}}$ , except the reactant ratio between pyrrole, 3,5-dimethoxybenzaldehyde, and 3,5-dihydroxybenzaldehyde. Synthetic procedures for all compounds are illustrated in Schemes S1 and S2.

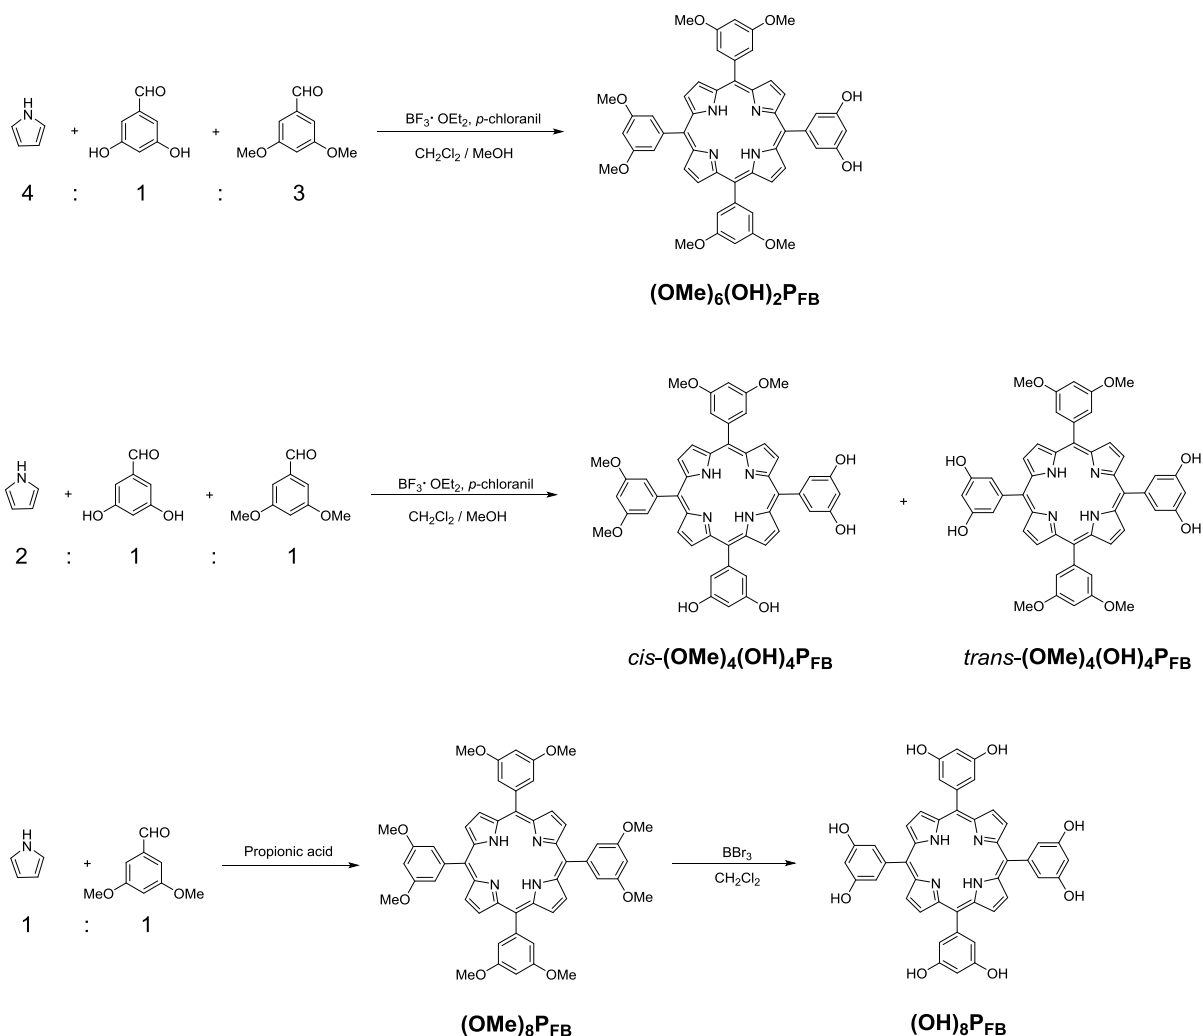

**Scheme S1.** Synthetic procedure for free-base porphyrins.

*Cis*-(OMe)<sub>4</sub>(OH)<sub>4</sub>P<sub>FB</sub> and *trans*-(OMe)<sub>4</sub>(OH)<sub>4</sub>P<sub>FB</sub>: To a mixture solution of 3,5-dihydroxybenzaldehyde (300 mg, 2.17 mmol) and 3,5-dimethoxybenzaldehyde (361 mg, 2.17 mmol) in CHCl<sub>3</sub>/MeOH (10:1) mixture solvent (200 mL), pyrrole (300  $\mu$ L, 4.34 mmol) and BF<sub>3</sub>·OEt<sub>2</sub> (0.2 mL, 1.62 mmol) were added and stirred for 30 m at 0 °C and 12 h at 25 °C, respectively, under N<sub>2</sub> atmosphere. Then, *p*-chloranil (854 mg, 3.47 mmol) was added to the reaction mixture and further stirred for 12 h at 25 °C. The reaction mixture was evaporated to dryness and subjected to flash silica column chromatography using 5 % MeOH containing CH<sub>2</sub>Cl<sub>2</sub> as the eluent to remove insoluble impurities. Further purification was conducted

through gradient column chromatography with gradually increasing ratio of MeOH (0 – 5 %) in CH<sub>2</sub>Cl<sub>2</sub> as eluent. Every fraction was collected separately and subjected to MALDI TOF MS to confirm molecular weight of each fraction. From the result of MALDI TOF MS, the third and fourth fractions were matched with the molecular weight of (OMe)<sub>4</sub>(OH)<sub>4</sub>P<sub>FB</sub>. The third and fourth fractions was evaporated to dryness and recrystallized from THF/n-hexane to give purple solids. Although both *trans*-(OMe)<sub>4</sub>(OH)<sub>4</sub>P<sub>FB</sub> and *cis*-(OMe)<sub>4</sub>(OH)<sub>4</sub>P<sub>FB</sub> showed similar <sup>1</sup>H NMR spectra, after the coupling reaction with **P4**, the third and fourth fractions were identified as *trans*-(OMe)<sub>4</sub>(OH)<sub>4</sub>P<sub>FB</sub> and *cis*-(OMe)<sub>4</sub>(OH)<sub>4</sub>P<sub>FB</sub>, respectively.

*Cis*-(OMe)<sub>4</sub>(OH)<sub>4</sub>P<sub>FB</sub>: Isolation yield (50 mg, 6 %). <sup>1</sup>H-NMR (400 MHz, CD<sub>3</sub>OD): δ = 8.96 (8 H; overlapped peak of pyrrolic-β H in P<sub>FB</sub>), 7.37 (s, 4 H; *o*-C<sub>6</sub>H<sub>3</sub>), 7.15 (s, 4 H; *o*-C<sub>6</sub>H<sub>3</sub>), 6.95 (s, 2 H; *p*-C<sub>6</sub>H<sub>3</sub>), 6.72 (s, 2 H; *p*-C<sub>6</sub>H<sub>3</sub>). MALDI TOF MS for C<sub>48</sub>H<sub>38</sub>N<sub>4</sub>O<sub>8</sub> m/z: caldc. 798.84, [M<sup>+</sup>]; found.799.934.

*Trans*-(OMe)<sub>4</sub>(OH)<sub>4</sub>P<sub>FB</sub>: Isolation yield (7.5 mg, 1 %). <sup>1</sup>H-NMR (400 MHz, CD<sub>3</sub>OD): δ = 8.96 (8 H; overlapped peak of pyrrolic-β H in P<sub>FB</sub>), 7.38 (s, 4 H; *o*-C<sub>6</sub>H<sub>3</sub>), 7.15 (s, 4 H; *o*-C<sub>6</sub>H<sub>3</sub>), 6.96 (s, 2 H; *p*-C<sub>6</sub>H<sub>3</sub>), 6.72 (s, 2 H; *p*-C<sub>6</sub>H<sub>3</sub>). MALDI TOF MS for C<sub>48</sub>H<sub>38</sub>N<sub>4</sub>O<sub>8</sub> m/z: caldc. 798.84, [M<sup>+</sup>]; found.799.908.

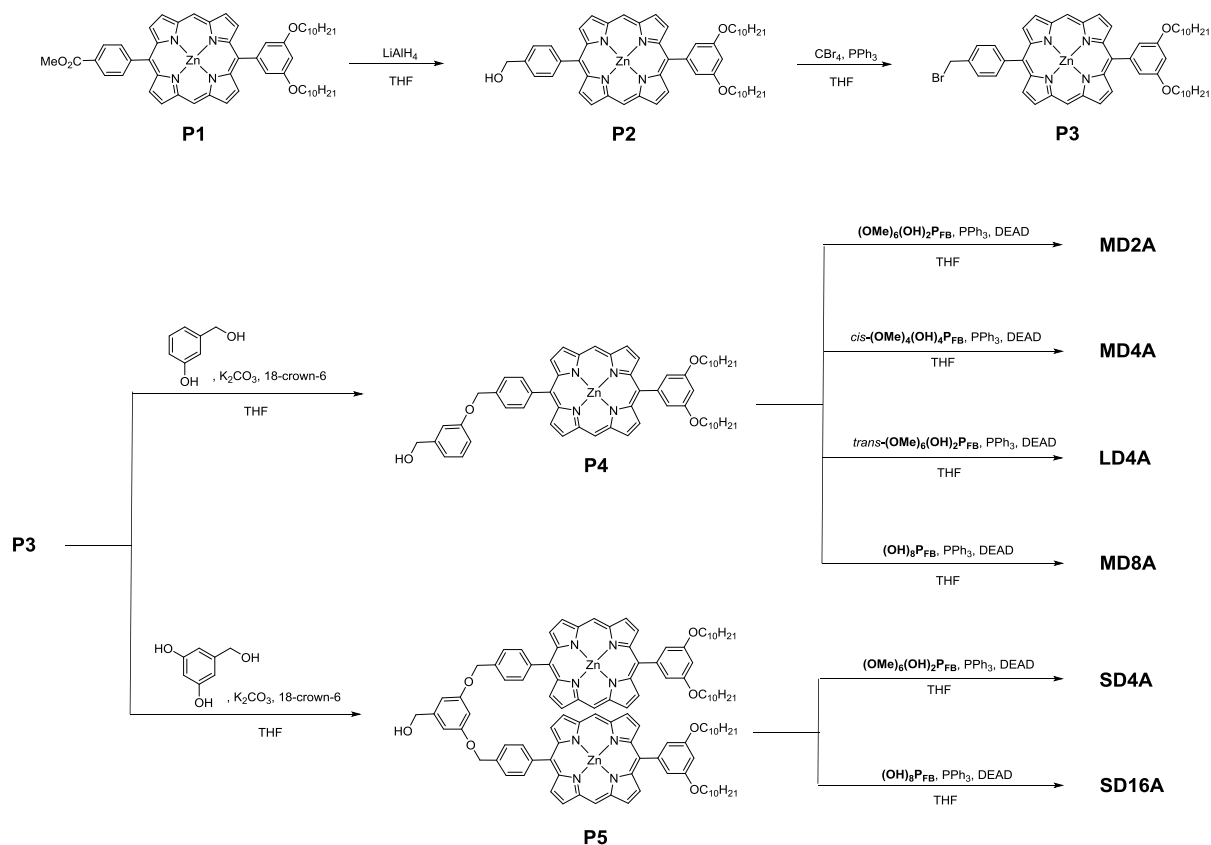

**Scheme S2.** Synthetic procedure for multi-porphyrin dendrimers.

**P4:** To a mixture solution of **P3** (688 mg, 0.792 mmol) and 3-hydroxybenzyl alcohol (76.0 mg, 0.612 mmol) in anhydrous THF (1.5 mL),  $\text{K}_2\text{CO}_3$  (111 mg, 0.803 mmol) and 18-crown-6 ether (152 mg, 0.617 mmol) were added and refluxed for 2 days under  $\text{N}_2$  atmosphere. The reaction mixture was evaporated to dryness. The residue was dissolved to  $\text{CH}_2\text{Cl}_2$  and washed with distilled water. The combined organic layer was dried over  $\text{Na}_2\text{SO}_4$ . The crude solution was evaporated to dryness and purified by silica column chromatography with  $\text{CH}_2\text{Cl}_2$  and ethyl acetate as the eluent to obtain **P4** as the form of bright red solid (615 mg, quantitative yield).  $^1\text{H-NMR}$  (400 MHz,  $\text{CDCl}_3$ ):  $\delta = 10.33$  (s, 2 H; meso-*H* in  $\text{P}_{\text{Zn}}$ ), 9.45 (t, 2H; pyrrolic- $\beta$  *H* in  $\text{P}_{\text{Zn}}$ ), 9.28-9.27 (d, 2H; pyrrolic- $\beta$  *H* in  $\text{P}_{\text{Zn}}$ ), 9.18-9.16 (d, 2 H; pyrrolic- $\beta$  *H* in  $\text{P}_{\text{Zn}}$ ), 8.31-8.29 (d, 2 H; *o*- $\text{C}_6\text{H}_4$ - $\text{P}_{\text{Zn}}$ ), 7.88-7.86 (d, 2 H; *m*- $\text{C}_6\text{H}_4$ - $\text{P}_{\text{Zn}}$ ), 7.44-6.92 (m, 7 H; overlapped peaks of  $\text{C}_6\text{H}_4$  and  $\text{C}_6\text{H}_3$ - $\text{P}_{\text{Zn}}$ ), 5.43 (s, 2 H; Ar- $\text{CH}_2$ -O-Ar), 4.57-4.50 (d, 2 H; Ar- $\text{CH}_2$ -OH),

4.17-4.13 (t, 4 H;  $-OCH_2-(CH_2)_8CH_3$ ), 1.90-0.83 (m, 38 H; overlapped peaks of  $-(CH_2)_8CH_3$ ).

MALDI TOF MS for  $C_{60}H_{68}N_4O_4Zn$  m/z: calcd. 974.59,  $[M^+]$ ; found: 974.387.

**MD2A:** To a mixture solution of **(OMe)<sub>6</sub>(OH)<sub>2</sub>P<sub>FB</sub>** (30.0 mg, 0.0363 mmol), **P4** (74.0 mg, 0.0759 mmol) and  $PPh_3$  (20.0 mg, 0.0763 mmol) in dry THF (3.0 mL), 40 % solution of diethylazodicarboxylic acid (DEAD) in toluene (35  $\mu$ L, 0.077 mmol) was slowly added and vigorously stirred at 0 °C for 30 m and 25 °C for 18 h under  $N_2$  atmosphere. The reaction mixture was evaporated for dryness. The residue was dissolved in  $CH_2Cl_2$  and washed with distilled water. The combined organic layer was dried over  $Na_2SO_4$ . The crude solution was evaporated to dryness and purified by silica column chromatography with  $CH_2Cl_2$  as the eluent. The first fraction was collected and further purified with preparative recycle SEC. The bright red powder of **MD2A** was obtained by freeze-drying from benzene in 17 % yield (16.8 mg).  $^1H$ -NMR (400 MHz,  $CDCl_3$ ):  $\delta$  = 9.99 (s, 4 H; meso-*H* in  $P_{Zn}$ ), 9.26-8.92 (m, 24 H; overlapped peaks of pyrrolic- $\beta$  *H* in  $P_{Zn}$  and  $P_{FB}$ ), 7.69-7.62 (d, 4 H; *o*- $C_6H_4$ - $P_{Zn}$ ), 7.44-7.43 (d, 4 H; *m*- $C_6H_4$ - $P_{Zn}$ ), 7.33-6.72 (m, 26 H; overlapped peaks of  $C_6H_4$ ,  $C_6H_3$ - $P_{Zn}$ , and  $C_6H_3$ - $P_{FB}$ ), 5.26 (s, 4 H;  $P_{Zn}$ -Ar- $CH_2$ -O-Ar), 5.19 (s, 4 H; Ar- $CH_2$ -O-Ar- $P_{FB}$ ), 4.17-4.13 (t, 8 H;  $-OCH_2-(CH_2)_8CH_3$ ), 3.85 (s, 6 H; Ar-O- $CH_3$ ), 3.78 (s, 12 H; Ar-O- $CH_3$ ), 1.92-0.85 (m, 76 H; overlapped peaks of  $-(CH_2)_8CH_3$ ), -2.72 (s, 2 H; -*NH* in  $P_{FB}$ ).  $^{13}C$ -NMR (100 MHz,  $CDCl_3$ ):  $\delta$  = 159.20, 158.87, 158.47, 158.18, 150.01, 149.91, 149.50, 144.30, 142.47, 138.61, 136.18, 132.76, 132.36, 129.92, 120.27, 119.52, 15.10, 114.73, 114.65, 10.21, 100.94, 100.27, 100.22, 70.43, 68.66, 66.89, 55.84, 32.09, 29.77, 29.67, 29.62, 29.53, 29.33, 22.88, 14.27. MALDI TOF MS for  $C_{170}H_{174}N_{12}O_{14}Zn_2$  m/z: calcd. 2740.03,  $[M^+]$ ; found: 2741.178.

**MD4A:** To a mixture solution of *cis*-(OMe)<sub>4</sub>(OH)<sub>4</sub>P<sub>FB</sub> (30 mg, 0.038 mmol), **P4** (154 mg, 0.158 mmol), PPh<sub>3</sub> (42 mg, 0.158 mmol) in dry THF (3.0 mL), 40 % solution of DEAD in toluene (72  $\mu$ L, 0.158 mmol) was slowly added and vigorously stirred for 1 h at 0 °C and 12 h at 25 °C under N<sub>2</sub> atmosphere. The reaction mixture was treated in a similar manner to that for **MD2A** to obtain **MD4A** as bright red powder in 2 % isolation yield (38 mg). <sup>1</sup>H-NMR (400 MHz, CDCl<sub>3</sub>):  $\delta$  = 9.76 (s, 8 H; meso-*H* in P<sub>Zn</sub>), 9.14-8.79 (m, 40 H; overlapped peaks of pyrrolic- $\beta$  *H* in P<sub>Zn</sub> and P<sub>FB</sub>), 7.93-6.87 (m, 56 H; overlapped peaks of all *aromatic-H*), 4.98-4.90 (d, 16 H; overlapped peaks of P<sub>Zn</sub>-Ar-CH<sub>2</sub>-O-Ar and Ar-CH<sub>2</sub>-O-Ar-P<sub>FB</sub>), 4.12-4.08 (t, 16 H; -OCH<sub>2</sub>-(CH<sub>2</sub>)<sub>8</sub>CH<sub>3</sub>), 3.69 (s, 12 H; -OCH<sub>3</sub>), 1.86-0.81 (m, 76 H; overlapped peaks of -(CH<sub>2</sub>)<sub>8</sub>CH<sub>3</sub>), -2.59 (s, 2 H; -NH in P<sub>FB</sub>). <sup>13</sup>C-NMR (100 MHz, CDCl<sub>3</sub>):  $\delta$  = 158.72, 158.63, 458.28, 157.89, 149.72, 149.52, 149.16, 148.94, 135.79, 134.63, 132.40, 132.02, 131.48, 131.33, 125.58, 119.74., 119.17, 114.56, 113.89, 113.78, 105.80, 105.76, 77.23, 669.99, 68.40, 55.45, 31.88, 29.59, 29.56, 29.46, 29.42, 29.31, 26.13, 22.66, 14.10. MALDI-TOF MS for C<sub>288</sub>H<sub>302</sub>N<sub>20</sub>O<sub>20</sub>Zn<sub>4</sub> m/z: calcd. 4625.12, [M<sup>+</sup>]; found: 4628.673.

**LD4A:** To a mixture solution of *trans*-(OMe)<sub>4</sub>(OH)<sub>4</sub>P<sub>FB</sub> (7.4 mg, 0.092 mmol), **P4** (38 mg, 0.039 mmol), PPh<sub>3</sub> (10 mg, 0.62 mmol) in dry THF (1.5 mL), 40 % solution of DEAD in toluene (18  $\mu$ L, 0.039 mmol) was slowly added and vigorously stirred for 0.5 h at 0 °C and 12 h at 25 °C under N<sub>2</sub> atmosphere. The reaction mixture was treated in a similar manner to that for **MD2A** to obtain **LD4A** as bright red powder in 2 % isolation yield (10 mg). <sup>1</sup>H-NMR (400 MHz, CDCl<sub>3</sub>):  $\delta$  = 9.91 (s, 8 H; meso-*H* in P<sub>Zn</sub>), 9.21-8.84 (m, 40 H; overlapped peaks of pyrrolic- $\beta$  *H* in P<sub>Zn</sub> and P<sub>FB</sub>), 7.92-6.88 (m, 56 H; overlapped peaks of all *aromatic-H*), 5.05-4.88 (d, 16 H; overlapped peaks of P<sub>Zn</sub>-Ar-CH<sub>2</sub>-O-Ar and Ar-CH<sub>2</sub>-O-Ar-P<sub>FB</sub>), 4.13-4.09 (t, 16 H; -OCH<sub>2</sub>-(CH<sub>2</sub>)<sub>8</sub>CH<sub>3</sub>), 3.63 (s, 12 H; -OCH<sub>3</sub>), 1.90-0.81 (m, 76 H; overlapped peaks of -



$(CH_2)_8CH_3$ ), -2.66 (s, 2 H; -NH in P<sub>FB</sub>). <sup>13</sup>C-NMR (100 MHz, CDCl<sub>3</sub>):  $\delta$  = 158.49, 149.99, 149.82, 149.48, 149.32, 134.90, 132.73, 132.30, 131.76, 131.667, 127.74, 125.85, 114.72, 114.09, 106.07, 101.02, 77.44, 70.28, 68.67, 68.59, 67.87, 55.59, 32.08, 29.92, 29.88, 29.79, 29.76, 29.67, 29.62, 29.52, 26.34, 14.31. MALDI-TOF MS for C<sub>288</sub>H<sub>302</sub>N<sub>20</sub>O<sub>20</sub>Zn<sub>4</sub> m/z: calcd. 4625.12, [M<sup>+</sup>]; found: 4627.461.

**MD8A:** To a mixture solution of **(OH)<sub>8</sub>P<sub>FB</sub>** (51.0 mg, 0.0687 mmol), **P4** (604 mg, 0.620 mmol), PPh<sub>3</sub> (163 mg, 0.621 mmol) in dry THF (1.0 mL), 40 % solution of DEAD in toluene (280  $\mu$ L, 0.616 mmol) was slowly added and vigorously stirred for 1 h at 0 °C and 12 h at 25 °C for under N<sub>2</sub> atmosphere. The reaction was monitored by thin layer chromatography and additional PPh<sub>3</sub> (163 mg, 0.621 mmol) and 40 % solution of DEAD in toluene (280  $\mu$ L, 0.616 mmol) were added to the reaction mixture at 0 °C and further stirred at 25 °C for 2 h. The reaction mixture was treated in a similar manner to that for **MD2A** to obtain **MD8A** as bright red powder in 17 % yield (100 mg). <sup>1</sup>H-NMR (400 MHz, CDCl<sub>3</sub>):  $\delta$  = 9.53-8.58 (m, 88 H; overlapped peaks of meso-*H* in P<sub>Zn</sub> and pyrrolic- $\beta$  *H* in P<sub>Zn</sub> and P<sub>FB</sub>), 7.66-6.38 (m, 100 H; overlapped peaks of all *aromatic-H*), 4.55-4.45 (d, 32 H; overlapped peaks of P<sub>Zn</sub>-Ar-CH<sub>2</sub>-O-Ar and Ar-CH<sub>2</sub>-O-Ar-P<sub>FB</sub>), 4.05 (t, 32 H; -OCH<sub>2</sub>-(CH<sub>2</sub>)<sub>8</sub>CH<sub>3</sub>), 1.81-0.89 (m, 304 H; overlapped peaks of -(CH<sub>2</sub>)<sub>8</sub>CH<sub>3</sub>), -2.25 (s, 2 H; -NH in P<sub>FB</sub>). <sup>13</sup>C-NMR (100 MHz, CDCl<sub>3</sub>):  $\delta$  = 158.35, 157.59, 149.69, 149.34, 149.05, 018.49, 144.49, 135.51, 134.66, 132.4, 131.97, 131.53, 131.28, 125.662, 119.72, 119.05, 119.48, 113.47, 105.68, 100.87, 69.81, 68.82, 68.52, 8.23, 32.07, 29.75, 29.64, 29.54, 29.51, 26.28, 22.86, 14.33, 14.00. MALDI-TOF MS for C<sub>524</sub>H<sub>558</sub>N<sub>36</sub>O<sub>32</sub>Zn<sub>8</sub> m/z: calcd. 8395.30, [M<sup>+</sup>]; found: 8403.855.

## SI Note 2. Steady-state absorption/emission spectra of multi-porphyrin dendrimers

The steady-state absorption and emission spectra of the multi-porphyrin dendrimers and the monomeric units of donor and acceptor were measured using a UV/VIS spectrometer Shimadzu UV-2600 and a FL spectrometer Horiba QM-400, respectively, as shown in Figure S8. Figures S8c - S8h show that the absorption spectra of the multi-porphyrin dendrimers are well fit with a linear combination of the absorption spectra of the monomeric units of donor and acceptor. The donor-to-acceptor ratio determined from a linear combination fit of the absorption spectrum of each dendrimer is equal to the donor-to-acceptor number ratio predicted based on the chemical structure of the dendrimer. These results confirm that the electronic couplings between porphyrins are weak and the spectral overlap integral does not change despite the variation of  $n_D$  and  $d_{DD}$ . The energy transfer between porphyrins would occur only through the FRET mechanism because of weak electronic coupling between porphyrins.

### **SI Note 3. Molecular dynamics simulations for multi-porphyrin dendrimers.**

The bonded parameters of the MD force field were generated by using the generalized AMBER force field (GAFF),<sup>2</sup> while the non-standard zinc atom of the donor molecule was connected to the nitrogen atoms by a harmonic bond potential of  $r_0 = 0.2042$  nm and  $k = 3.8585 \times 10^5$  kJ mol<sup>-1</sup> nm<sup>-1</sup>. The electrostatics were modelled by disassembling the dendrimer molecules into fragments, and fitting the atomic partial charges of each fragment by the restrained electrostatic potential (RESP) method.<sup>3</sup> The structures of the fragment molecules are displayed in Figure S9. The electrostatic potential around the fragments were evaluated by Q-Chem 4.0 quantum chemistry package,<sup>4</sup> with DFT/B3LYP/6-31G(d,p) level of theory. Then the electrostatic potentials were converted to the atomic partial charges. The dispersion parameters were taken from GAFF, with the zinc parameters from AMBER99 force field.

For all MD simulations, one dendrimer molecule was placed in a cubic box of 7.0 nm side length and was solvated by tetrahydrofuran (THF) molecules. The THF molecules were parametrized by using GAFF and RESP, in a similar way to the dendrimer molecules. In the room temperature, the conformational change of the dendrimer appeared to be too slow, especially for molecules with large number of branches (MD8A and SD16A). Therefore, we facilitated the conformational sampling by a two-step procedure. First, a single trajectory was run at an elevated temperature, at which crossing the free energy barriers between local minima is much easier than in room temperature. After running the simulation for a sufficiently long time, the snapshots along the trajectory were gathered and separately used as initial conditions for relatively short room temperature simulations. The actual conformation pools for the analysis were formed from these room temperature trajectories.

The high-temperature simulations were run at 800 K in the canonical (constant NVT) condition for 105 ns for SD4A and MD4A, and 55 ns for other dendrimers. After truncating the first 5 ns of the trajectory as the equilibration period, snapshots of the system were collected every 100 ps. Each snapshot was cooled down during 100 ps in isothermal-isobaric (constant NPT) condition with 293 K and 1 bar, and then subjected to another 500 ps of production run in the same condition. During the production run, snapshots of the trajectory were saved every 1 ps. For all simulations, the temperature and the pressure were maintained by velocity-rescale thermostat<sup>5</sup> and Parrinello-Rahman barostat,<sup>6</sup> respectively. The electrostatic and dispersion interactions were treated via force shifting with 12 Å cutoffs with the buffering region of 2 Å, together with periodic boundary conditions. The time step for numerical integration was 1 fs at 800 K, and 2 fs at 293 K.

We defined  $d_{DA}$  as the distance between the center of the free-base porphyrin (acceptor) and zinc atom in each zinc porphyrin (donor), and  $d_{DD}$  as the distance from a zinc

atom to the zinc atom in each zinc porphyrin. The  $d_{\text{DA}}$  and  $d_{\text{DD}}$  distributions and mean values obtained from structures calculated by MD simulations are shown in Figure 4. Structures with  $d_{\text{DA}}$  or  $d_{\text{DD}}$  less than 0.5 nm were excluded because they are incompatible with the absorbance spectra. Similarity of  $d_{\text{DA}}$  distributions for all donors shows that each donor can be freely located within a certain distance range, that is, within the linker allowed range. The peak of  $d_{\text{DA}}$  distribution is not located in the middle of the distance distribution but has an asymmetric shape weighted toward longer distances, which seems to be due to the spherical shape of the dendrimer. This is because the farther  $d_{\text{DA}}$  is, the more space the donor can be located in. In summary,  $d_{\text{DA}}$  distribution obtained from the MD simulations shows that the dendrimer exists in a spherical form and the mean  $d_{\text{DA}}$  is approximately  $1.69 \pm 0.44$  nm for all dendrimers.

#### **SI Note 4. Experimental determination of FRET efficiencies in multi-porphyrin dendrimers**

In general,  $\eta_{\text{FRET}}$  is determined by measuring (i) the change in the fluorescence intensity of the donor or (ii) the change of the excited-state lifetime of the donor when the acceptor is absent or present. However, the former method is likely to overestimate  $\eta_{\text{FRET}}$  because the fluorescence intensity of the donor can be reduced by other photophysical processes besides FRET. Also, the former method requires that the fluorescence intensities of the donor should be compared with both the FRET sample (that is, MCSs containing donors and an acceptor) and the control sample (that is, monomers of donor) having the exactly same donor concentration. However, it is very difficult to accurately adjust the concentration of the donor because the absorption features of the zinc porphyrin donor and the free-base porphyrin acceptor significantly overlap with each other at visible wavelengths. In contrast, the excited-state lifetime of the donor does not change with the concentration of a sample solution. Thus,

we determined  $\eta_{\text{FRET}}$  by measuring the excited-state lifetime of the donor. For all of the excited-state lifetime measurements, the excitation light at 543 nm was used to preferentially excite the zinc porphyrin donor. From the measured excited-state lifetimes of FRET sample and donor-only sample,  $\eta_{\text{FRET}}$  can be determined as follows:

$$\eta_{\text{FRET}} = 1 - \tau_{\text{DA}}/\tau_{\text{D}} \quad (\text{S1})$$

where  $\tau_{\text{DA}}$  is the excited-state lifetime of the FRET sample and  $\tau_{\text{D}}$  is the excited-state lifetime of the donor-only sample.

### SI Note 5. Excitation power dependence of TA signals

Exciton-exciton annihilation (EEA) is a common phenomenon observed in multi-chromophore systems, including zinc porphyrin dendrimers.<sup>7,8</sup> To check whether the TA signals of the multi-porphyrin dendrimers contain any contribution of EEA, we measured the TA signals of SD4A, which have the smallest  $d_{\text{DD}}$  among the dendrimers investigated in our study, while varying the pulse energy of the pump pulse, as shown in Figure S11. As a control experiment, we also measured the TA signal of SD4, a multi-porphyrin dendrimer consisting of only four donors without any acceptor, so that the TA signal without any contribution of FRET can be measured. The results show that the TA signals of both SD4A and SD4 decay more rapidly as the pulse energy of the pump pulse increases, indicating that the EEA occurs with the excitation of high fluence. To minimize the contribution of EEA, the TA spectra were measured with the pump pulses of 50 nJ energy.

### SI Note 6. Calculation of theoretical FRET efficiencies in multi-porphyrin dendrimers

To calculate the theoretical  $\eta_{\text{FRET}}$  of the multi-porphyrin dendrimers using the simulations, we first need to determine which case, among (i) to (iv), the multi-porphyrin dendrimers belong

to. Since the linkers connecting the donors and the acceptor are composed of many single bonds, each donor will be in an arbitrary orientation with respect to the acceptor. However, it would be difficult for the donors to rotate rapidly because of long hydrocarbon chains. According to the MD simulations on the multi-porphyrin dendrimers,  $d_{DA}$  and  $d_{DD}$  are distributed as shown in Figure 4. Thus, the multi-porphyrin dendrimers investigated in this study correspond to case (iv). To calculate the theoretical  $\eta_{\text{FRET}}$ 's of multi-porphyrin dendrimers, it is necessary to know the shapes of distributions and the mean values of the normalized inter-chromophore distances (that is,  $\Delta_{DA}$  and  $\Delta_{DD}$ ) for all the chromophore pairs composing the dendrimers.  $\Delta_{DA}$  can be calculated by dividing the mean  $d_{DA}$  obtained from the MD simulations by the Förster radius of the D-A pair. To calculate the Förster radius of the D-A pair, the emission quantum yield of the donor and the spectral overlap integral between the donor and the acceptor in THF solvent were determined to be 3.3 % and  $3.93 \times 10^{14} \text{ nm}^4 \text{ M}^{-1} \text{ cm}^{-1}$ , respectively, from static emission measurement. These values are similar to those reported in previous studies on zinc porphyrin.<sup>9,10</sup> Based on these values and the refractive index of THF (1.404), the Förster radius of the D-A pair and  $\Delta_{DA}$  were calculated to be 2.43 nm and 0.7, respectively, using Equation (3) in the Methods section. In the same manner, the Förster radius of the D-D pair and  $\Delta_{DD}$  were calculated. The Förster radius for the D-D pair was determined to be 1.92 nm, and  $\Delta_{DD}$  was determined to be 1.0 for the short D-D pair, 1.2 for the medium D-D pair, and 1.5 for the long D-D pair. Finally, the theoretical  $\eta_{\text{FRET}}$  of the multi-porphyrin dendrimers were calculated from the simulations considering the distributions and the mean values of  $\Delta_{DA}$  and  $\Delta_{DD}$ , as shown in Table 1. Since there are too many D-A and D-D pairs in SD16A, it was difficult to consider them all. Therefore, we estimated that the

theoretical  $\eta_{\text{FRET}}$  of SD16A lies in the range between  $\eta_{\text{FRET}}$ 's of D12A and D20A when  $\Delta_{\text{DD}}$  is 1.0.

### SI Note 7. Enhancement of FRET efficiency in the model MCSs examined with simulations

While  $\Delta_{\text{DA}}$  is the main factor that determines  $\eta_{\text{FRET}}$ , the distribution of  $\Phi_{\text{FRET}}$  reflects structural heterogeneity in an MCS and thus is a good measure of estimating the degree of enhancement of  $\eta_{\text{FRET}}$  (that is,  $\Delta\eta_{\text{FRET}}$ ) aided by homo-FRET. When multiple donors in an MCS have different  $\Phi_{\text{FRET}}$  values from each other, D-D energy transfer (that is, homo-FRET) would activate the detour FRET paths of high efficiencies. Therefore, as the distribution of  $\Phi_{\text{FRET}}$  becomes broader, homo-FRET would enhance  $\eta_{\text{FRET}}$  further, resulting in a larger  $\Delta\eta_{\text{FRET}}$  value.

Here we need to consider the origins of the distribution of  $\Phi_{\text{FRET}}$ . The distribution of  $\Phi_{\text{FRET}}$  arises from different origins in cases (ii) - (iv) investigated in the present study. In case (ii), the distribution of  $\Phi_{\text{FRET}}$  is governed by the distribution of  $\kappa^2$ . As can be seen in Figure S12, the distribution of  $\kappa^2$  is asymmetric with a large population around  $\kappa^2 = 0$ . As a result of such asymmetric distribution of  $\kappa^2$ , the distribution of  $\Phi_{\text{FRET}}$  is also asymmetric and largely populated below its mean value,  $\eta_{\text{FRET}}$ . Therefore, at large  $\Delta_{\text{DA}}$  values where  $\eta_{\text{FRET}}$  is small, the distribution of  $\Phi_{\text{FRET}}$  tends to be narrow and, at small  $\Delta_{\text{DA}}$  values where  $\eta_{\text{FRET}}$  is large, the distribution of  $\Phi_{\text{FRET}}$  tends to be broad. For example, the distributions of  $\Phi_{\text{FRET}}$  at various  $\Delta_{\text{DA}}$  values in case (ii) are shown in Figure S15. It can be seen that the distribution of  $\Phi_{\text{FRET}}$  is the narrowest at  $\Delta_{\text{DA}} = 1.6$  and the broadest at  $\Delta_{\text{DA}} = 0.8$ . Due to the narrow distribution of  $\Phi_{\text{FRET}}$

at  $\Delta_{\text{DA}} > 1.5$ ,  $\Delta\eta_{\text{FRET}}$  is negligibly small in that  $\Delta_{\text{DA}}$  region, as can be seen in Figure S14j. To examine how the distribution of  $\Phi_{\text{FRET}}$  influences  $\Delta\eta_{\text{FRET}}$ , we compared  $\Delta\eta_{\text{FRET}}$  and the width of  $\Phi_{\text{FRET}}$  distribution with respect to  $\Delta_{\text{DA}}$ . The width of  $\Phi_{\text{FRET}}$  distribution can be quantified by the variance of the distribution. As can be seen in Figure S17a,  $\Delta\eta_{\text{FRET}}$  and the variance of  $\Phi_{\text{FRET}}$  distribution are in good agreement with each other, indicating that the  $\Delta\eta_{\text{FRET}}$  value at a given  $\Delta_{\text{DA}}$  is governed by the width of  $\Phi_{\text{FRET}}$  distribution.

In case (iii), the distribution of  $\Phi_{\text{FRET}}$  is governed by the distribution of  $\Delta_{\text{DA}}$ . Specifically, as the distribution of  $\Delta_{\text{DA}}$  becomes broader, the distribution of  $\Phi_{\text{FRET}}$  becomes broader and therefore  $\Delta\eta_{\text{FRET}}$  increases, as shown in Figure S16. In our simulations, for all of the model MCSs, we set the width of the  $\Delta_{\text{DA}}$  distribution to be constant with the relative standard deviation (RSD) of 20 %, irrespective of the mean  $\Delta_{\text{DA}}$  value. As stated above, we remind that  $\eta_{\text{FRET}}$  is mainly governed by  $\Delta_{\text{DA}}$ . As a result, as shown in Figure S14j - S14l, even with the constant width of the  $\Delta_{\text{DA}}$  distribution,  $\Delta\eta_{\text{FRET}}$  also varies depending on the value of  $\Delta_{\text{DA}}$ . For example, in case (iii), when  $\Delta_{\text{DA}}$  is varied by 0.1, FRET efficiency changes by only 0.1 % around  $\Delta_{\text{DA}} = 0.2$  but changes by 12 % around  $\Delta_{\text{DA}} = 1.0$ , as can be seen in Figure S14k. This observation indicates that the distribution of  $\Phi_{\text{FRET}}$  varies depending on the  $\Delta_{\text{DA}}$  value, even when the width of  $\Delta_{\text{DA}}$  distribution is constant. As was done for case (ii), we also compared  $\Delta\eta_{\text{FRET}}$  and the width of  $\Phi_{\text{FRET}}$  distribution with respect to  $\Delta_{\text{DA}}$ , with the width of  $\Phi_{\text{FRET}}$  distribution quantified by its variance. As shown in Figure S17b,  $\Delta\eta_{\text{FRET}}$  and the variance of  $\Phi_{\text{FRET}}$  distribution are in good agreement with each other. Therefore, at  $\Delta_{\text{DA}} < 0.4$  where the distribution of  $\Phi_{\text{FRET}}$  is narrow,  $\Delta\eta_{\text{FRET}}$  is negligibly small, as can be seen in Figure



S14k. As mentioned in main text, in case (iv), the distribution of  $\Phi_{\text{FRET}}$  is governed by distributions of both  $\kappa^2$  and  $\Delta_{\text{DA}}$ , as confirmed by the comparison of  $\Delta\eta_{\text{FRET}}$  for case (iv) with the sum of  $\Delta\eta_{\text{FRET}}$ 's for cases (ii) and (iii) shown in Figure S18. Therefore, in case (iv),  $\eta_{\text{FRET}}$  is enhanced in the entire  $\Delta_{\text{DA}}$  region.

### SI Note 8. Enhancement of FRET efficiency dependent on normalized D-A distance

We examined how  $\Delta\eta_{\text{FRET}}$  changes depending on  $\Delta_{\text{DA}}$ . When  $\Delta_{\text{DA}}$  has a distribution of values as in case (iii), we found that the shape of  $\Delta\eta_{\text{FRET}}$  depending on  $\Delta_{\text{DA}}$  is similar to the inverse of the 1st derivative of  $\eta_{\text{FRET}}$  with respect to  $\Delta_{\text{DA}}$ ,  $-\text{d}\eta_{\text{FRET}} / \text{d}\Delta_{\text{DA}}$ , as can be seen in Figure S14g and S14k. To confirm this idea, we compared the  $\Delta_{\text{DA}}$  dependences of  $\Delta\eta_{\text{FRET}}$  and  $-\text{d}\eta_{\text{FRET}} / \text{d}\Delta_{\text{DA}}$  in Figure S19c. As expected, it can be seen that  $\Delta\eta_{\text{FRET}}$  depending on  $\Delta_{\text{DA}}$  is in good agreement with  $-\text{d}\eta_{\text{FRET}} / \text{d}\Delta_{\text{DA}}$ . In other words, when there exists structural heterogeneity of  $\Delta_{\text{DA}}$ ,  $\Delta\eta_{\text{FRET}}$  is determined by the 1st derivative of the Förster's equation with respect to  $\Delta_{\text{DA}}$ . As a result,  $\Delta\eta_{\text{FRET}}$  is large at intermediate  $\Delta_{\text{DA}}$  values where the slope of  $\eta_{\text{FRET}}$  with respect to  $\Delta_{\text{DA}}$  is large, and  $\Delta\eta_{\text{FRET}}$  is small at small or large  $\Delta_{\text{DA}}$  values where the slope of  $\eta_{\text{FRET}}$  with respect to  $\Delta_{\text{DA}}$  is small. We also note that the curves of  $\Delta\eta_{\text{FRET}}$  depending on  $\Delta_{\text{DA}}$  for all the model MCSs have the same shapes as each other, as can be seen in Figure S19b. Therefore,  $n_{\text{D}}$  only determines the overall degree of  $\Delta\eta_{\text{FRET}}$ , not the shape of  $\Delta\eta_{\text{FRET}}$  depending on  $\Delta_{\text{DA}}$ . This finding provides the underlying principle for the determination of  $\Delta\eta_{\text{FRET}}$  in the presence of structural heterogeneity of  $\Delta_{\text{DA}}$ , that is, (i) the enhancement of  $\eta_{\text{FRET}}$

by homo-FRET is governed by the 1st derivative of the Förster's equation with respect to  $\Delta_{DA}$ , independent of  $n_D$ , and (ii) the magnitude of  $\Delta\eta_{\text{FRET}}$  is determined by  $n_D$ .

We also examined how  $\Delta\eta_{\text{FRET}}$  is influenced by the changes of  $n_D$  and  $\Delta_{DD}$ . In case (ii) with a distribution of  $\kappa^2$ , homo-FRET among a large number of donors with various transition dipole orientations effectively serves as rapid rotational diffusion of chromophores, allowing the energy transfer to occur at the donors having favorable dipole orientations. Similarly, in case (iii) with a distribution of  $\Delta_{DA}$ , homo-FRET among a large number of donors effectively serves as rapid translational diffusion of the donors, allowing the energy transfer to occur at donors having favorable  $\Delta_{DA}$ 's. Actually, the enhancement of  $\eta_{\text{FRET}}$  due to the translational diffusion of donor and acceptor molecules has been already reported in previous studies.<sup>11,12</sup> Thus, the increase of  $n_D$  and the decrease  $\Delta_{DD}$  can effectively increase the rate of homo-FRET, resulting in the increase of  $\Delta\eta_{\text{FRET}}$ . However, as the rate of homo-FRET reaches a certain limit, the enhancement of  $\eta_{\text{FRET}}$  becomes saturated, probably because the decrease of  $\Delta_{DD}$  increases the number of detour paths no longer. Also, the enhancement of  $\eta_{\text{FRET}}$  with the increase of  $n_D$  becomes saturated. For example, as shown in Figure S20, as  $n_D$  increases,  $\eta_{\text{FRET}}$  curve of DnA in case (ii) converges the  $\eta_{\text{FRET}}$  curve of D1A in case (i), which corresponds to the dynamic isotropic limit. Thus, the increase of  $\Delta\eta_{\text{FRET}}$  with the increase of  $n_D$  and the decrease  $\Delta_{DD}$  is saturated at a certain limit.

### SI Note 9. Comparison with previous studies

Our simulations can explain the seemingly conflicting results of the previous studies and well describes the FRET efficiency in MCSs. In agreement with our simulations, the  $\Delta\eta_{\text{FRET}}$  with

the aid of homo-FRET has been already suggested in a previous study. According to a previous spectroscopic study on DNA-fluorophore systems,<sup>13</sup> it was experimentally demonstrated that the molecular system consisting of two donors and a single acceptor exhibits a higher  $\eta_{\text{FRET}}$  than the system consisting of a single donor and a single acceptor. Also, according to simulations performed on the same molecular systems, such increase of  $\eta_{\text{FRET}}$  in the molecular system with an additional donor is attributed to the occurrence of homo-FRET. Notably, the simulations in that previous study showed that  $\eta_{\text{FRET}}$  changes only by 3 % when  $d_{\text{DD}}$  is changed from 13 Å ( $\Delta_{\text{DD}} = 0.25$ ) to 20 Å ( $\Delta_{\text{DD}} = 0.38$ ), that is, 54 % increase, implying that  $\eta_{\text{FRET}}$  is not much affected by the rate of homo-FRET. Such insensitivity of  $\eta_{\text{FRET}}$  to  $\Delta_{\text{DD}}$  can be explained by the results of our simulations. According to our simulations, the increase of  $\Delta\eta_{\text{FRET}}$  with the decrease of  $\Delta_{\text{DD}}$  is saturated at  $\Delta_{\text{DD}} < 0.4$ , as can be seen in Figure S14. This observation implies that the decrease of  $\Delta_{\text{DD}}$  below a certain threshold does not increase the number of detour FRET paths via homo-FRET any further, as discussed in SI Note 8. In other words, any additional decrease of  $\Delta_{\text{DD}}$  from the saturation limit does not significantly enhance  $\eta_{\text{FRET}}$ . Thus, the limited increase of  $\Delta\eta_{\text{FRET}}$  with the decrease of  $d_{\text{DD}}$  observed in this previous study suggests that  $\Delta_{\text{DD}}$  was varied only in a narrow range.

Olejko and coworkers<sup>14</sup> showed the influence of  $n_{\text{D}}$  on  $\eta_{\text{FRET}}$  using MCSs consisting of multiple donors (FAM) and a single acceptor (Cy5) attached to the DNA origami structure, as mentioned in the Introduction section. They determined  $\eta_{\text{FRET}}$  from the measured fluorescence lifetime of the donor, while varying  $n_{\text{D}}$  from one to four, and concluded that the increase of  $n_{\text{D}}$  barely affects  $\eta_{\text{FRET}}$ . This observation can be easily rationalized by noting that

their MCSs correspond to conditions where  $\eta_{\text{FRET}}$  is hardly affected by  $n_{\text{D}}$ . In their molecular systems, since the dyes are rigidly fixed to the DNA origami structure at desired positions, the distances between the dyes would vary negligibly and the dipole orientations of the dyes are expected to change on much slower time scale than FRET. On the other hand, since it is difficult to achieve the perfect alignment of dipoles of dyes, the dyes are expected to have random orientations. Therefore, their MCSs correspond to case (ii). Based on the fact that the measured  $\eta_{\text{FRET}}$  was  $\sim 20\%$ ,  $\Delta_{\text{DA}}$  of these MCSs is estimated to be about 1.2. Our simulation results (see Figure S14j) show that the  $\Delta\eta_{\text{FRET}}$  is only  $\sim 2\%$  under these conditions since the FRET pathways from all donors are inefficient regardless of  $\kappa^2$ . We note that the simulation results shown in Figure S14j are for  $\Delta_{\text{DD}} = 0.1$ . Since  $\Delta_{\text{DD}}$  of the MCSs used in the previous study is estimated to be much longer than 0.1,  $\eta_{\text{FRET}}$  will be hardly enhanced with the increase of  $n_{\text{D}}$ . In contrast to the one-step FRET systems (FAM-Cy5), the two-step FRET systems (FAM-Cy3-Cy5), whose  $\Delta_{\text{DA}}$  is reduced from 1.2 to 0.8 due to the increased spectral overlap, show  $\sim 10\%$  enhancement of  $\eta_{\text{FRET}}$  as the number of FAM-Cy3 increases. Thus, the MCSs investigated in that previous study are under the conditions where  $\eta_{\text{FRET}}$  is hardly affected by  $n_{\text{D}}$ .

Buckhout-White and coworkers<sup>15</sup> studied the effects of multiple donors on  $\eta_{\text{FRET}}$  using DNA networks including linear, bifurcated, Holliday junctions, and 8-arm star structures corresponding to case (ii) for the same reasons as the MCSs based on DNA origami study.<sup>14</sup> In that study, for 20 molecular systems whose  $\Delta_{\text{DA}}$  was systematically varied,  $\eta_{\text{FRET}}$  was determined from the measurements of fluorescence from donors. For those systems, it was found that  $\eta_{\text{FRET}}$  does not show clear dependence on  $n_{\text{D}}$  even in MCSs with  $\Delta_{\text{DA}} = 0.75$  where the  $\Delta\eta_{\text{FRET}}$  is expected to be largest in case (ii). This result might be due to the low

formation efficiency of some of the MCSs used in that study. For example, the formation efficiencies of linear and bifurcated structures are very high (> 90 %) but those of 8-arm star structures and Holliday junction structure with  $\Delta_{DA} = 0.75$  are very low (< 20 %). In fact, when only the MCSs of high formation efficiencies are considered, it can be clearly seen that  $\eta_{\text{FRET}}$  is enhanced with the increase of  $n_D$ . In addition, for the MCSs of high formation efficiencies,  $\Delta_{DA}$  dependence of  $\Delta\eta_{\text{FRET}}$  is also in good agreement with the results of our simulations.

### SI Note 10. Principle for prediction of FRET efficiency in multi-chromophore systems

The simulations presented in this work can be utilized to calculate the theoretical  $\eta_{\text{FRET}}$  of various MCSs. First, it is needed to determine which case, among cases (i) - (iv), an MCS of interest belongs to, based on the chemical structure of the MCS. The next step is to estimate the structural parameters of the MCS, for example mean values and distributions of normalized inter-chromophore distances (that is,  $\Delta_{DA}$  and  $\Delta_{DD}$ ) between all chromophore pairs. The Förster radii of the D-A and D-D pair can be calculated by using steady-state spectra of the donor and the acceptor. The distributions of  $\Delta_{DA}$ ,  $\Delta_{DD}$  and  $\kappa^2$  can be obtained from MD simulations. By solving a series of differential equations as in Equation (2), the excited-state populations of chromophores at given  $\Delta_{DA}$  and  $\Delta_{DD}$  values can be obtained as a function of time. Finally,  $\eta_{\text{FRET}}$  at given  $\Delta_{DA}$  and  $\Delta_{DD}$  values can be obtained by averaging  $\Phi_{\text{FRET}}$  of all donors obtained from simulations. To properly reflect the distributions of structural parameters in the simulations, it is desirable to sample more than 100,000 occurrences.

**SI Reference**

- [1] W.-D. Jang, C.-H. Lee, M.-S. Choi, M. Osada, *J. Porphyrins Phthalocyanines*, **2009**, 13, 787-793.
- [2] J. Wang, R. M. Wolf, J. W. Caldwell, P. A. Kollman, D. A. Case, *J. Comput. Chem.*, **2004**, 25, 1157–1174.
- [3] C. I. Bayly, P. Cieplak, W. Cornell, P. A. Kollman, *J. Phys. Chem.*, **1993**, 97, 10269–10280 (1993).
- [4] Y. Shao, Z. Gan, E. Epifanovsky, A. T.B. Gilbert, M. Wormit, J. Kussmann, A. W. Lange, A. Behn, J. Deng, X. Feng, D. Ghosh, M. Goldey, P. R. Horn, L. D. Jacobson, I. Kaliman, R. Z. Khaliullin, T. Kuś, A. Landau, J. Liu, E. I. Proynov, Y. M. Rhee, R. M. Richard, M. A. Rohrdanz, R. P. Steele, E. J. Sundstrom, H. L. Woodcock III, P. M. Zimmerman, D. Zuev, B. Albrecht, E. Alguire, B. Austin, G. J. O. Beran, Y. A. Bernard, E. Berquist, K. Brandhorst, K. B. Bravaya, S. T. Brown, D. Casanova, C.-M. Chang, Y. Chen, S. H. Chien, K. D. Closser, D. L. Crittenden, M. Diedenhofen, R. A. DiStasio Jr., H. Do, A. D. Dutoi, R. G. Edgar, S. Fatehi, L. Fusti-Molnar, A. Ghysels, A. Golubeva-Zadorozhnaya, J. Gomes, M. W. D. Hanson-Heine, P. H. P. Harbach, A. W. Hauser, E. G. Hohenstein, Z. C. Holden, T.-C. Jagau, H. Ji, B. Kaduk, K. Khistyayev, J. Kim, J. Kim, R. A. King, P. Klunzinger, D. Kosenkov, T. Kowalczyk, C. M. Krauter, K. U. Lao, A. D. Laurent, K. V. Lawler, S. V. Levchenko, C. Y. Lin, F. Liu, E. Livshits, R. C. Lochan, A. Luenser, P. Manohar, S. F. Manzer, S.-P. Mao, N. Mardirossian, A. V. Marenich, S. A. Maurer, N. J. Mayhall, E. Neuscammann, C. M. Oana, R. Olivares-Amaya, D. P. O'Neill, J. A. Parkhill, T. M. Perrine, R. Peverati, A. Prociuk, D. R. Rehn, E. Rosta, N. J. Russ, S. M. Sharada, S. Sharma, D. W. Small, A. Sodt, T. Stein, D. Stück, Y.-C. Su, A. J. W. Thom, T. Tsuchimochi, V. Vanovschi, L. Vogt, O. Vydrov, T. Wang, M. A. Watson, J. Wenzel, A. White, C. F. Williams, J. Yang, S. Yeganeh, S. R. Yost, Z.-Q. You, I. Y. Zhang, X. Zhang, Y. Zhao, B. R. Brooks, G. K. L. Chan, D. M. Chipman, C. J. Cramer, W. A. Goddard III, M.

S. Gordon, W. J. Hehre, A. Klamt, H. F. Schaefer III, M. W. Schmidt, C. D. Sherrill, D. G. Truhlar, A. Warshel, X. Xu, A. Aspuru-Guzik, R. Baer, A. T. Bell, N. A. Besley, J.-D. Chai, A. Dreuw, B. D. Dunietz, T.R. Furlani, S. R. Gwaltney, C.-P. Hsu, Y. Jung, J. Kong, D. S. Lambrecht, W. Z. Liang, C. Ochsenfeld, V. A. Rassolov, L. V. Slipchenko, J. E. Subotnik, T. V. Voorhis, J. M. Herbert, A. I. Krylov, P. M.W. Gill, M. Head-Gordon, *Mol. Phys.*, **2015**, 113, 184–215.

[5] G. Bussi, D. Donadio, M. Parrinello, *J. Chem. Phys.*, **2007**, 126, 014101.

[6] M. Parrinello, A. Rahman, *J. Appl. Phys.*, **1981**, 52, 7182–7190.

[7] J. Larsen, B. Brüggemann, T. Polívka, V. Sundström, E. Åkesson, J. Sly, M. J. Crossley, *J. Phys. Chem. A*, **2005**, 109, 10654–10662.

[8] J. Larsen, B. Brüggemann, J. Sly, M. J. Crossley, V. Sundström, E. Åkesson, *Chem. Phys. Lett.*, **2006**, 433, 159-164.

[9] S. Cho, W.-S. Li, M.-C. Yoon, T. K. Ahn, D.-L. Jiang, J. Kim, T. Aida, D. Kim, *Chem. Eur. J.*, **2006**, 12, 7576-7584.

[10] K. K. Jensen, S. B. van Berlekom, J. Kajanus, J. Mårtensson, B. Albinsson, *J. Phys. Chem. A*, **1997**, 101, 2218-2220.

[11] B. Wallace, P. J. Atzberger, *PLoS One*, **2017**, 12, No. e0177122.

[12] M. H. Jacob, R. N. Dsouza, I. Ghosh, A. Norouzy, T. Schwarzlose, W. M. Nau, *J. Phys. Chem. B*, **2013**, 117, 185–198.

[13] J. S. Melinger, A. Khachatrian, M. G. Ancona, S. Buckhout-White, E. R. Goldman, C. M. Spillmann, I. L. Medintz, P. D. Cunningham, *ACS Photonics* **2016**, 3, 659-669.

[14] L. Olejko, I. Bald, *RSC Adv.*, **2017**, 7, 23924-23934.

[15] S. Buckhout-White, C. M Spillmann, W. R. Algar, A. Khachatrian, J. S. Melinger, E. R. Goldman, M. G. Ancona, I. L. Medintz, *Nat. Commun.* **2014**, 5, 5615.

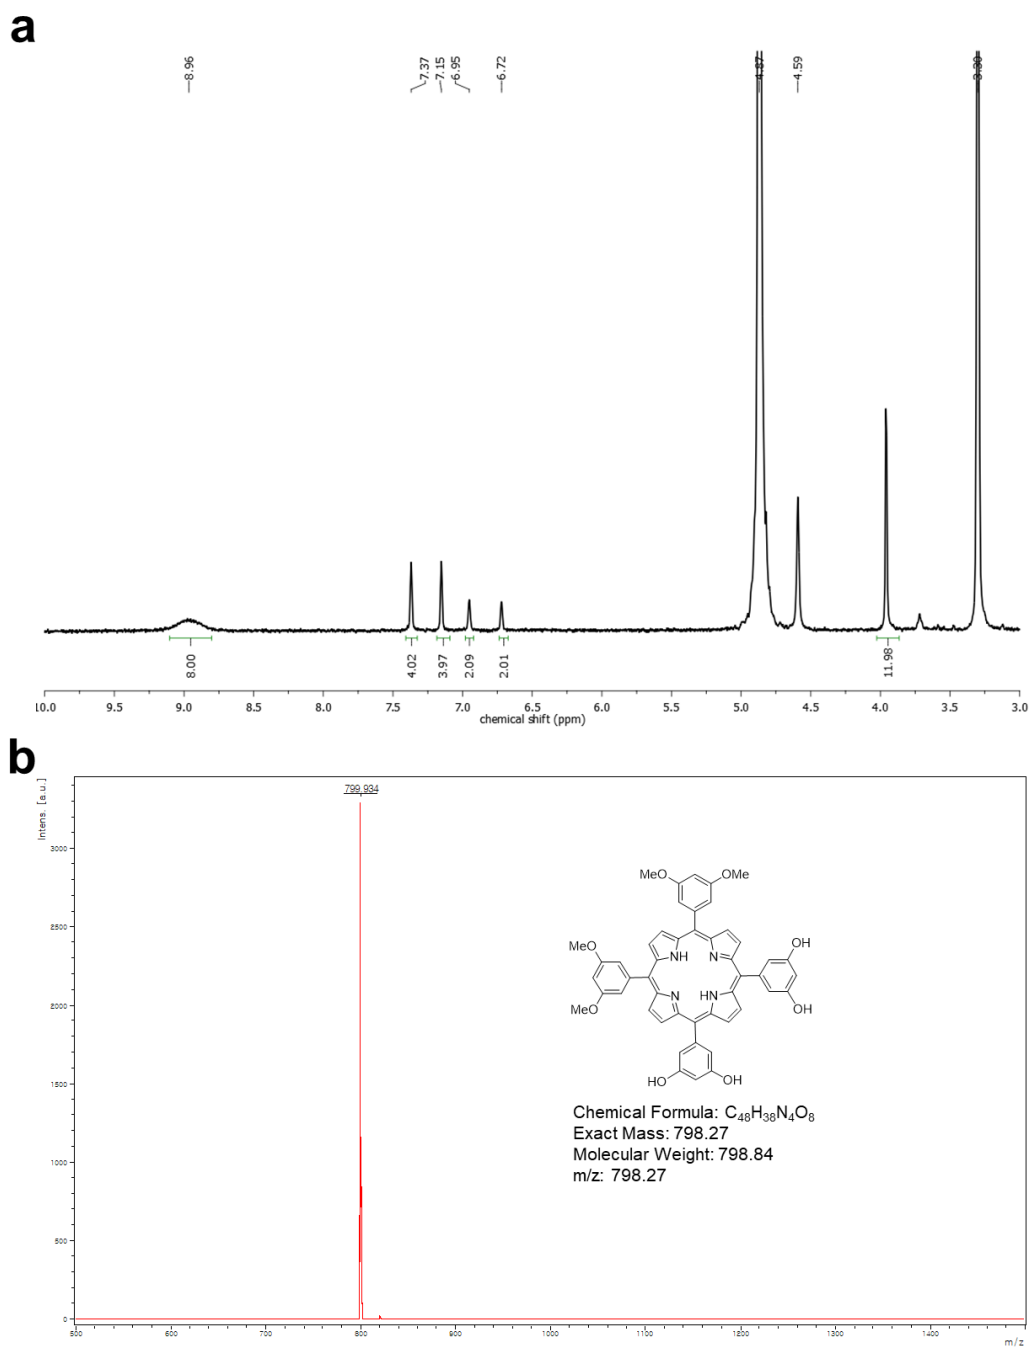

**Figure S1.** NMR and MALDI TOF MS spectra of *cis*-(OMe)<sub>4</sub>(OH)<sub>4</sub>PFB. (a) <sup>1</sup>H-NMR spectrum (400 MHz, MeOD). Residual solvent peaks at 4.87 ppm (water), 3.30 ppm (MeOH) and unknown peaks at 4.59 ppm. (b) MALDI TOF MS spectrum.



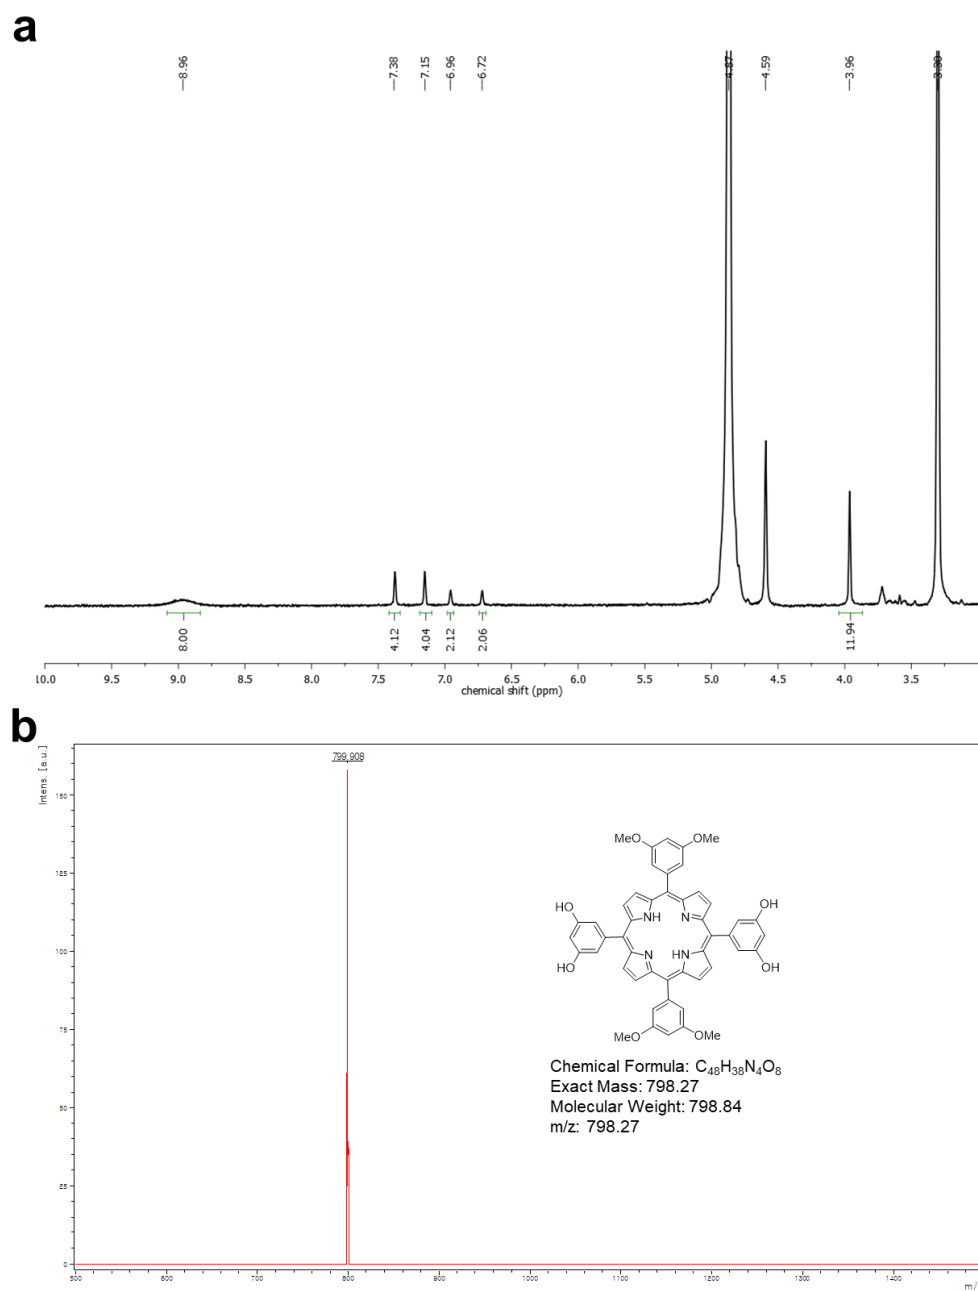

**Figure S2.** NMR and MALDI TOF MS spectra of *trans*-(OMe)<sub>4</sub>(OH)<sub>4</sub>P<sub>FB</sub>. (a) <sup>1</sup>H-NMR spectrum (400 MHz, MeOD). Residual solvent peaks at 4.87 ppm (water), 3.30 ppm (MeOH) and unknown peaks at 4.59 ppm. (b) MALDI TOF MS spectrum.

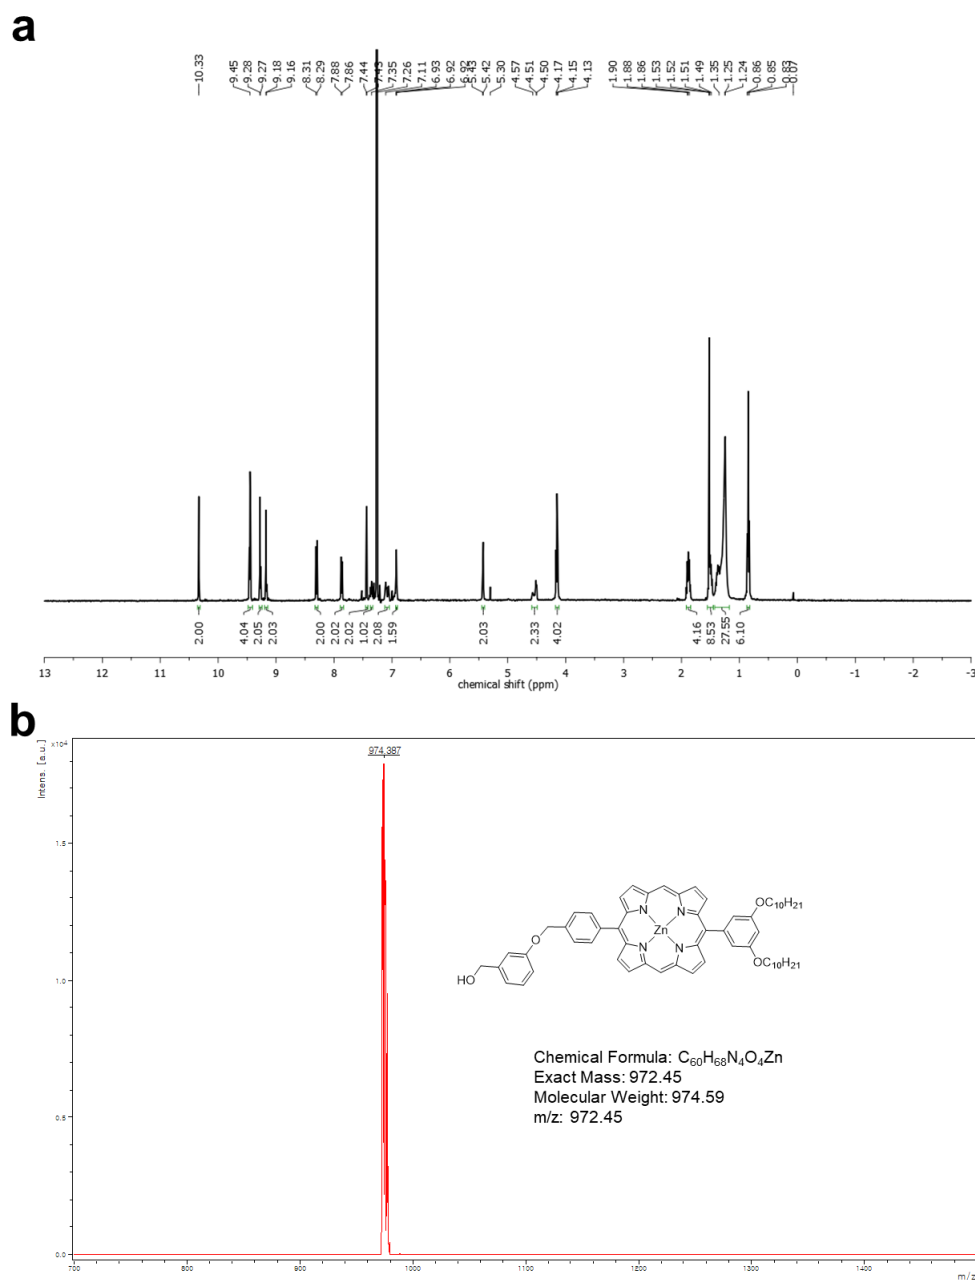

**Figure S3.** NMR and MALDI TOF MS spectra of P4. (a)  $^1\text{H}$ -NMR spectrum (400 MHz,  $\text{CDCl}_3$ ). Residual solvent peaks at 7.26 ppm ( $\text{CHCl}_3$ ), 5.30 ppm ( $\text{CH}_2\text{Cl}_2$ ) and 1.53 ppm (water). (b) MALDI TOF MS spectrum.



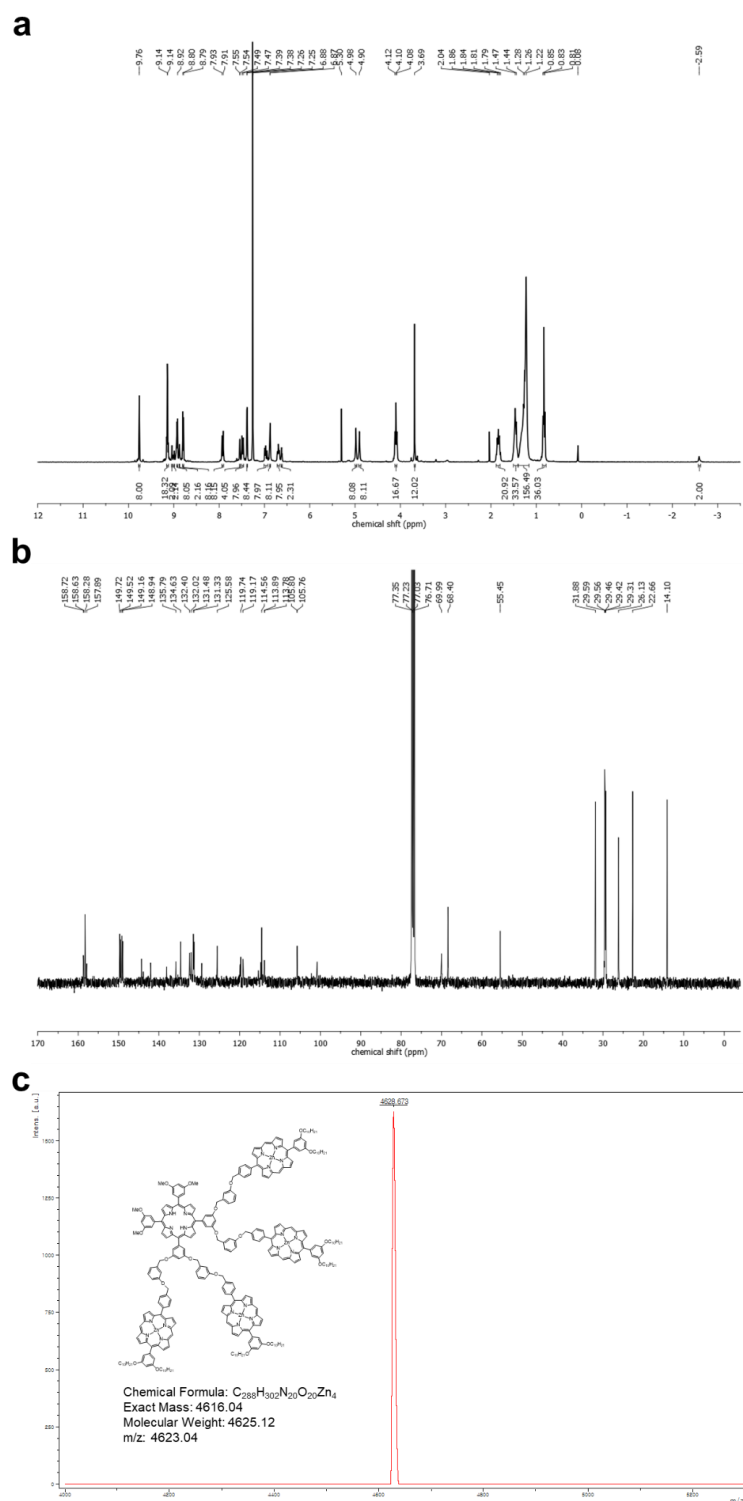

**Figure S5.** NMR and MALDI TOF MS spectra of MD4A. (a)  $^1\text{H}$ -NMR spectrum (400 MHz,  $\text{CDCl}_3$ ). Residual solvent peaks at 7.26 ppm ( $\text{CHCl}_3$ ), 5.30 ppm ( $\text{CH}_2\text{Cl}_2$ ) and 1.53 ppm (water). (b)  $^{13}\text{C}$ -NMR spectrum (100 MHz,  $\text{CDCl}_3$ ). (c) MALDI TOF MS spectrum.

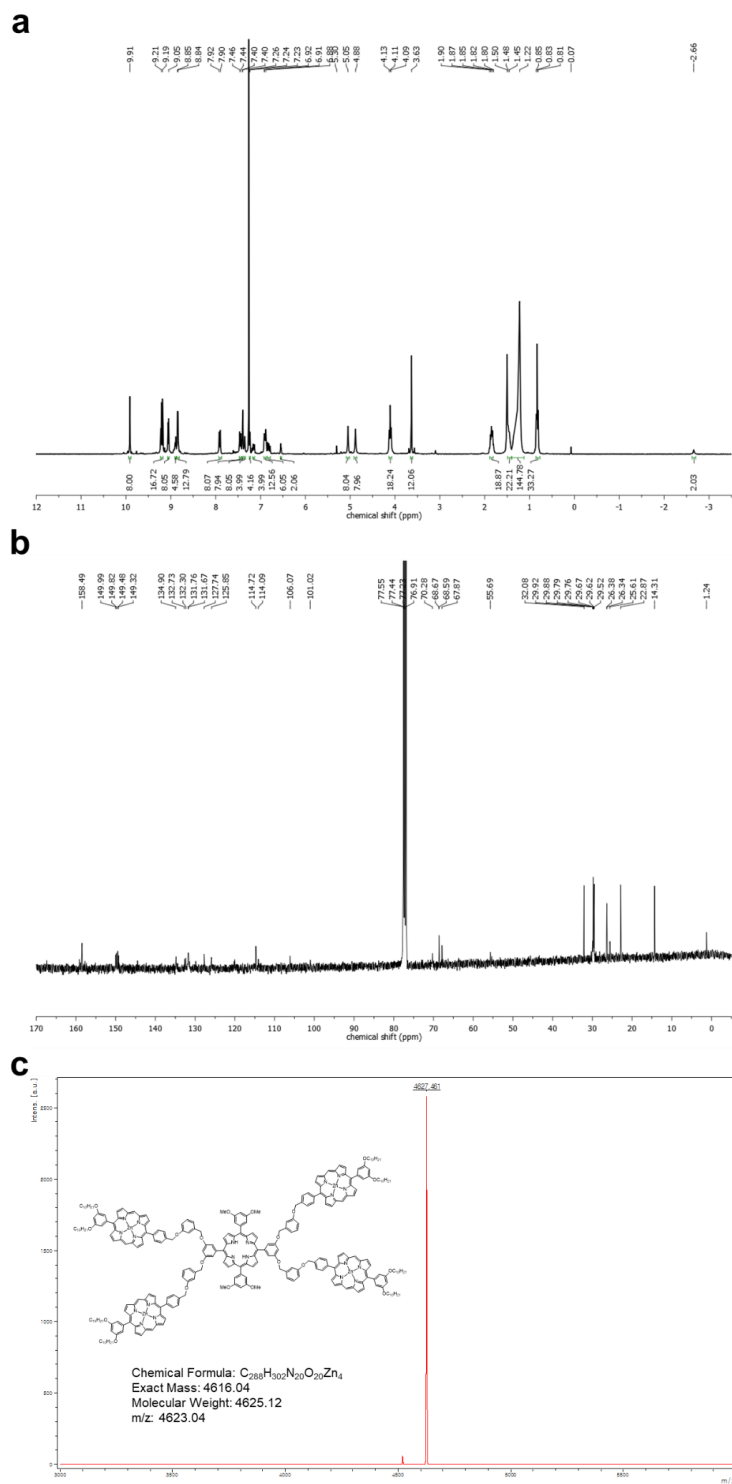

**Figure S6.** NMR and MALDI TOF MS spectra of LD4A. (a)  $^1\text{H}$ -NMR spectrum (400 MHz,  $\text{CDCl}_3$ ). (b)  $^{13}\text{C}$ -NMR spectrum (100 MHz,  $\text{CDCl}_3$ ). (c) MALDI TOF MS spectrum.



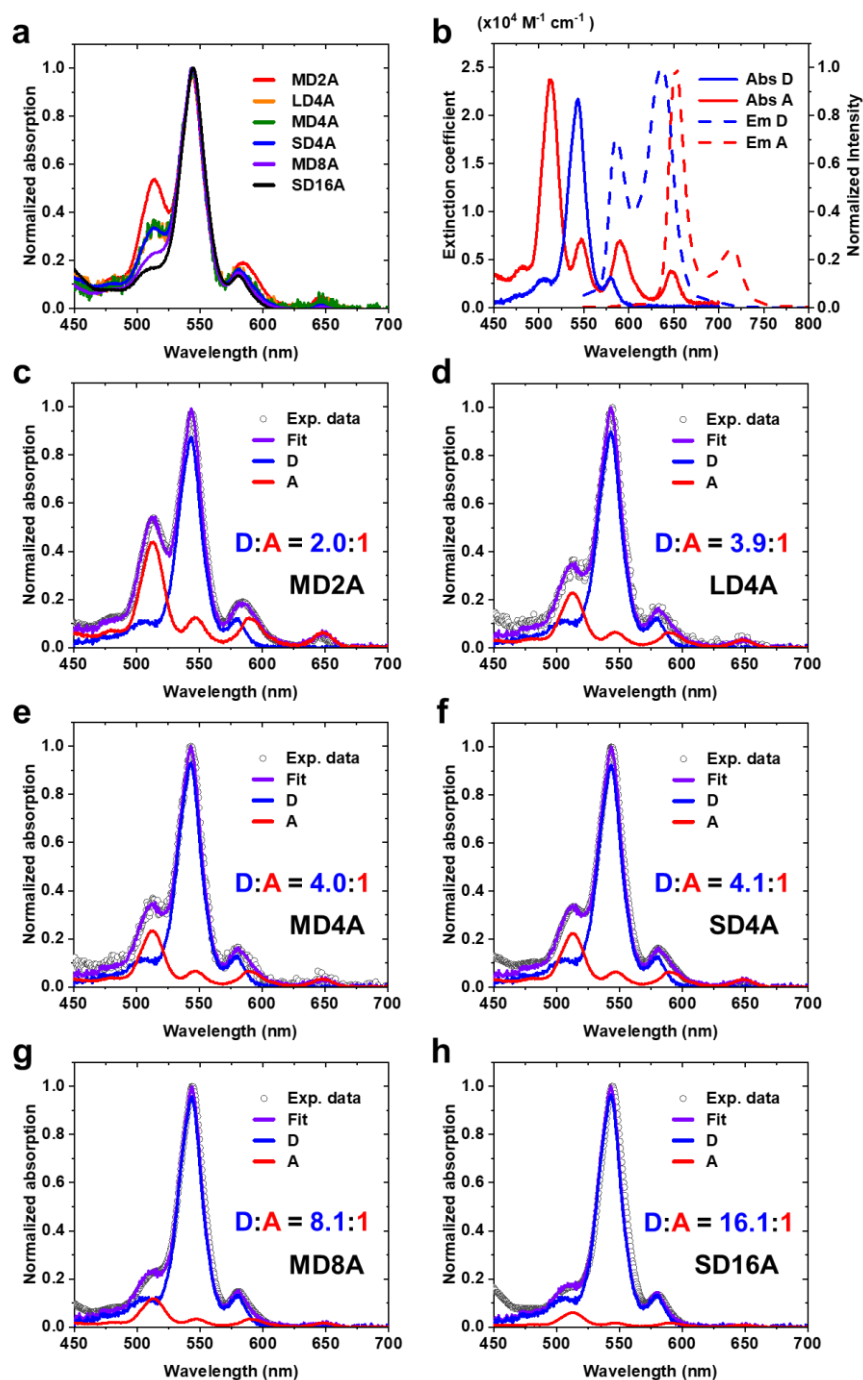

**Figure S8.** Steady-state absorption and emission spectra of monomeric porphyrins and multi-porphyrin dendrimers. (a) Normalized electronic absorption spectra of multi-porphyrin dendrimers. (b) The absorption (solid) and emission spectra (dashed) of the donor (blue) and the acceptor (red). (c - h) Fits (purple) of the experimental absorption spectra of dendrimers

(black circle) by the linear combination of the spectra of the donor (blue) and acceptor (red).

The ratio of donor to acceptor in the linear combination fit is shown in each figure.

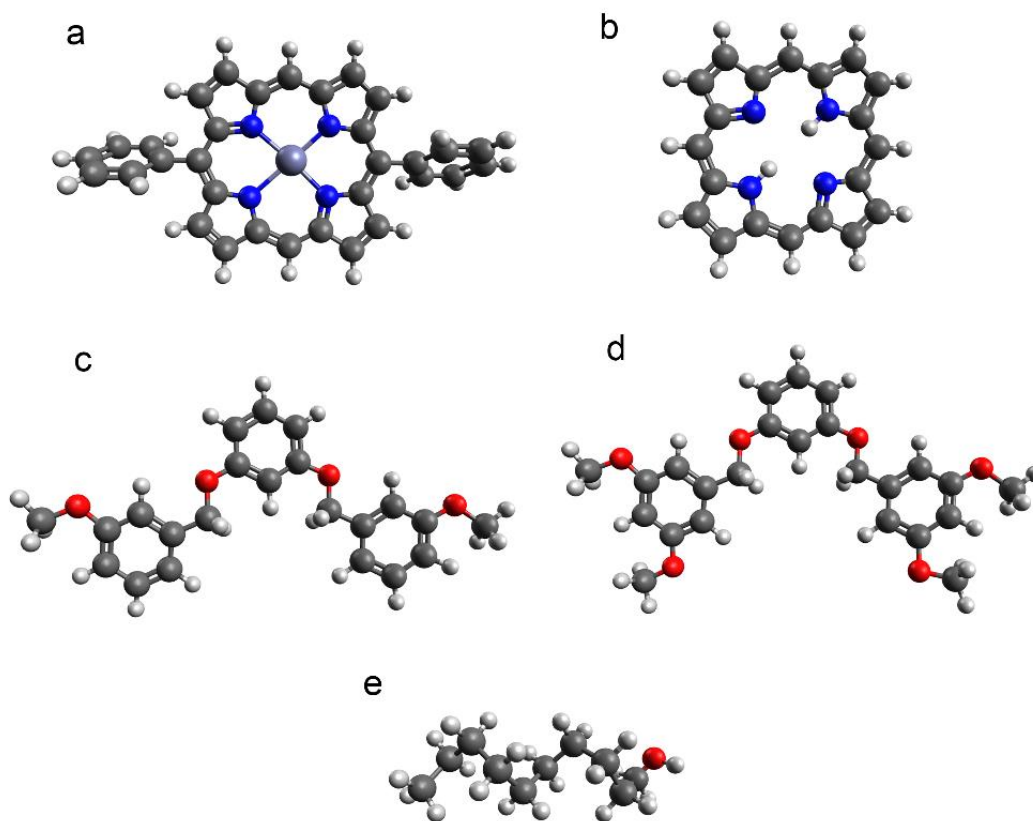

**Figure S9.** The dendrimer fragments used for fitting the atomic partial charges. (a) The donor fragment. (b) The acceptor fragment. (c) The bridge fragment for MD2A, MD4A, LD4A and MD8A. (d) The bridge fragment for SD4A and SD16A. (e) The hydrocarbon tail attached to the donor.



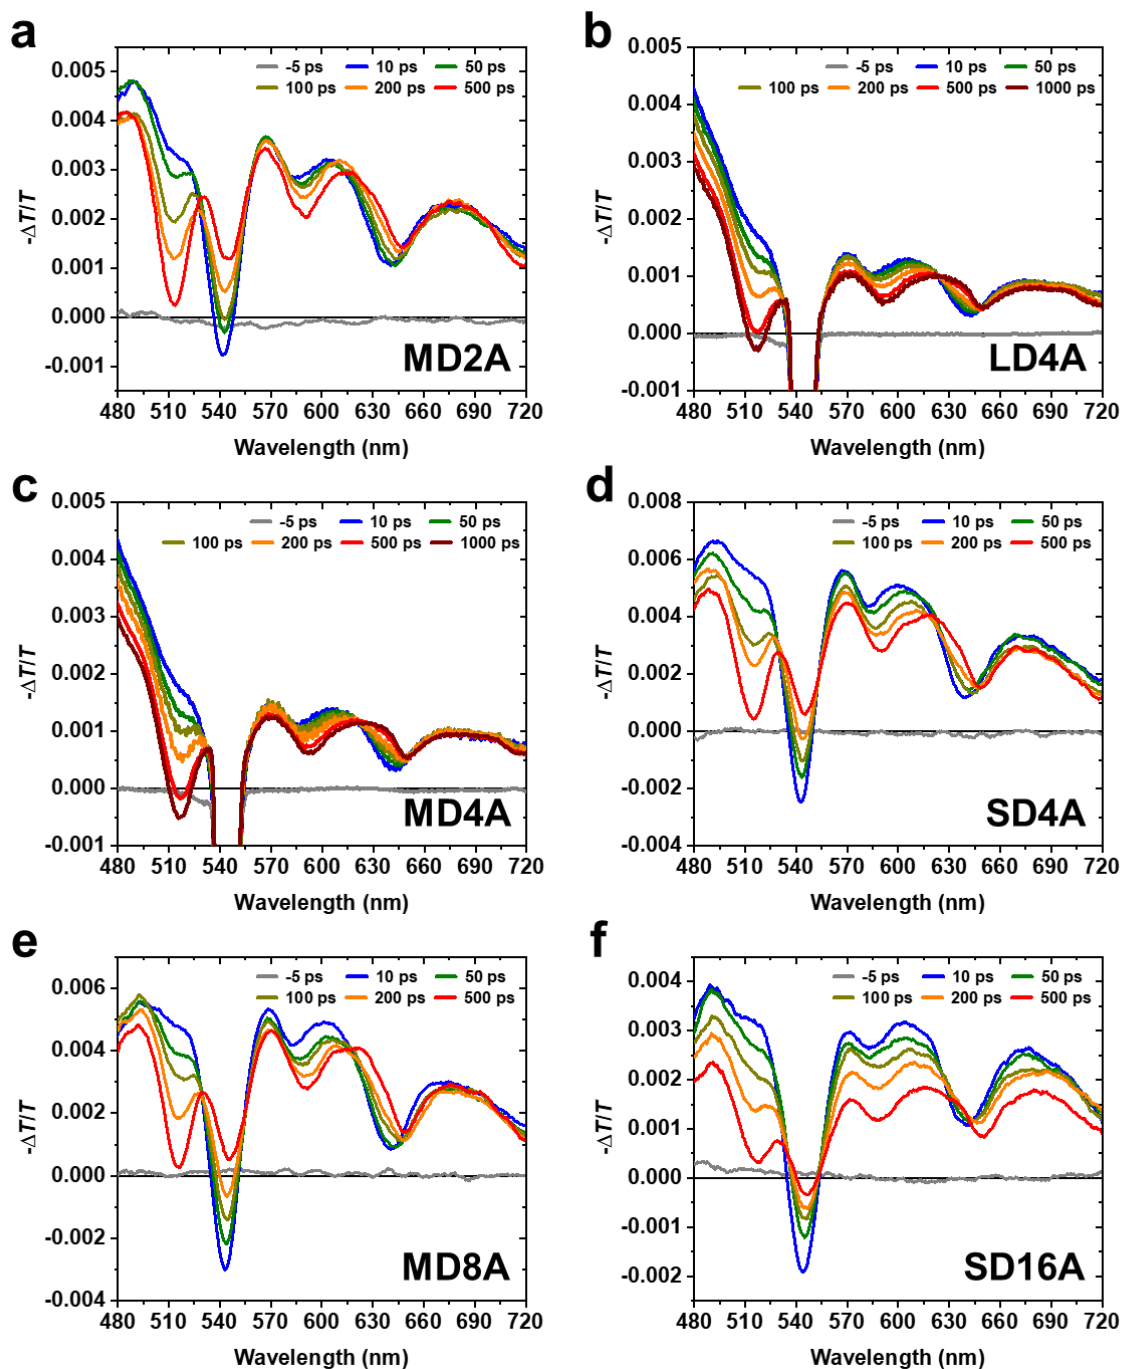

**Figure S10.** TA spectra of (a) MD2A, (b) LD4A, (c) MD4A, (d) SD4A, (e) MD8A, and (f) SD16A at  $-5$  ps (gray), 10 ps (blue), 50 ps (green), 100 ps (dark yellow), 200 ps (orange), 500 ps (red), and 1000 ps (brown). All TA spectra were measured with the pump wavelength of 540 nm and the pulse energy set to 50 nJ. For LD4A and MD4A, the negative peak is cropped because it is contaminated by the intense scattering by pump pulse.

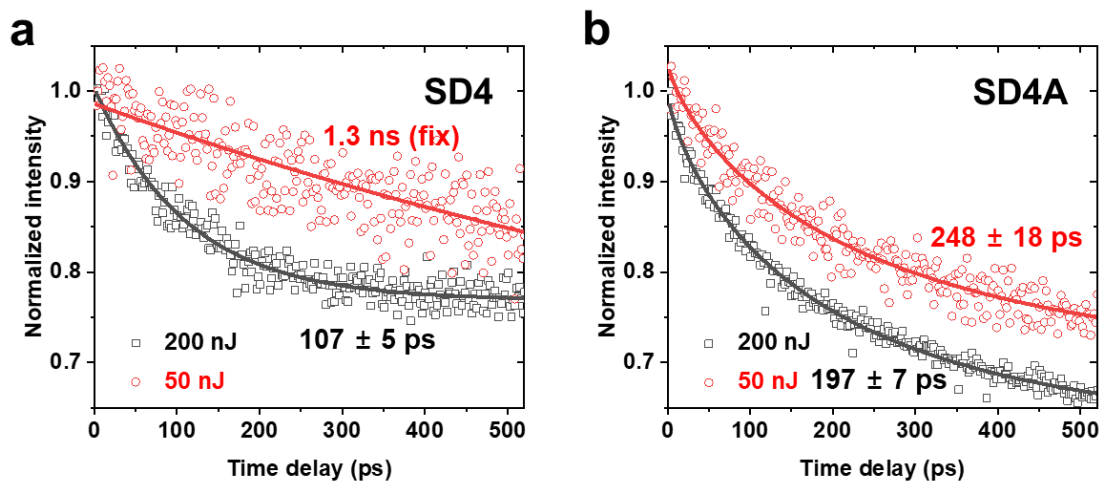

**Figure S11.** Dependence of the of TA signals on the pulse energy of pump pulses for (a) SD4, and (b) SD4A. The temporal profiles of the TA spectra measured with the pump pulse energies of 50 nJ (black) and 200 nJ (red) are represented by the first right singular vectors obtained from the singular value decomposition of the TA spectra.

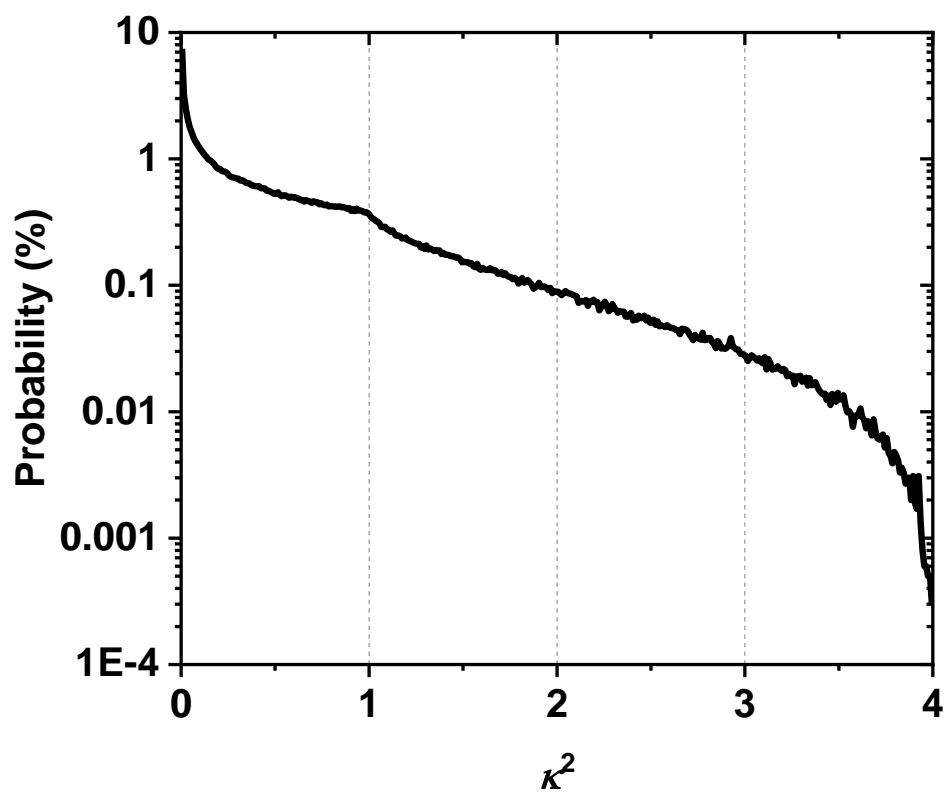

**Figure S12.** Distribution of orientation factors ( $\kappa^2$ ) in static isotropic limit obtained from Monte Carlo simulations. The average value of the distribution is  $\frac{2}{3}$ , which is used for the dynamic isotropic limit.

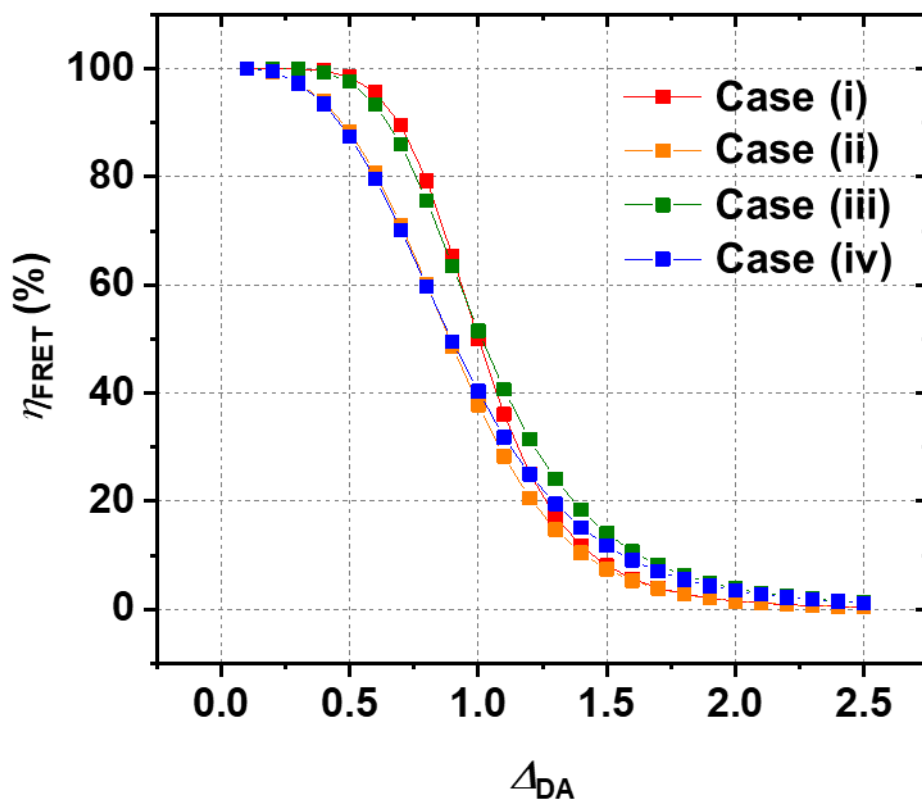

**Figure S13.**  $\eta_{\text{FRET}}$  of the D1A model as a function of  $\Delta_{\text{DA}}$  in cases (i) (blue), (ii) (cyan), (iii) (red), and (iv) (magenta).  $\eta_{\text{FRET}}$  was calculated from simulations with given values of  $\Delta_{\text{DA}}$  and  $\kappa^2$ .

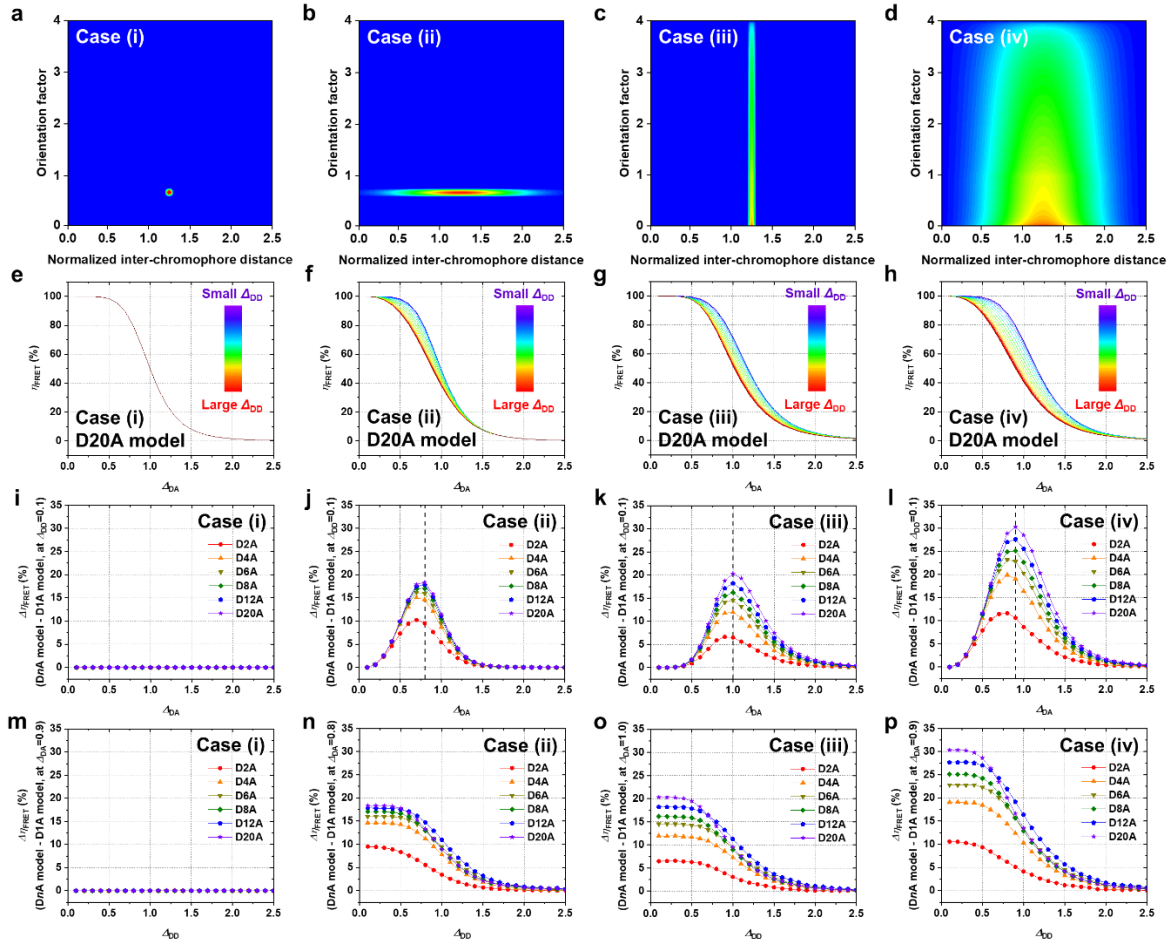

**Figure S14.** Simulation for calculating  $\eta_{\text{FRET}}$  in model MCSs for the four cases. (a - d) Schematic of distributions of the inter-chromophore distances and the orientation factor in the four cases used in our simulations. The distributions are shown in the form of heatmaps where blue and red indicate the lowest and highest values. (e - h) The FRET efficiency ( $\eta_{\text{FRET}}$ ) of D20A as a function of  $\Delta_{\text{DA}}$  for various  $\Delta_{\text{DD}}$  values.  $\eta_{\text{FRET}}$  was calculated from simulations with given values of  $\Delta_{\text{DA}}$ ,  $\Delta_{\text{DD}}$ , and  $\kappa^2$ .  $\eta_{\text{FRET}}$  curves for various  $\Delta_{\text{DD}}$  values are plotted following a rainbow color scheme, from red (the largest  $\Delta_{\text{DD}}$ ) to purple (the smallest  $\Delta_{\text{DD}}$ ). (i - l)  $\Delta\eta_{\text{FRET}}$  of DnA relative to D1A, that is  $\eta_{\text{FRET}}(\text{DnA}) - \eta_{\text{FRET}}(\text{D1A})$ , as a function of  $\Delta_{\text{DA}}$  with the shortest  $\Delta_{\text{DD}}$  ( $= 0.1$ ), for  $n = 2$  (red), 4 (orange), 6 (dark yellow), 8 (green), 12 (blue), and 20 (violet) models. The variation curve of  $\Delta\eta_{\text{FRET}}$  with respect to  $\Delta_{\text{DA}}$  was obtained by

subtracting the  $\eta_{\text{FRET}}$  curve of D1A shown in Figure S13 from the  $\eta_{\text{FRET}}$  curve of DnA with  $\Delta_{\text{DD}} = 0.1$ . (m - p)  $\Delta\eta_{\text{FRET}}$  of DnA relative to D1A, that is  $\eta_{\text{FRET}}(\text{DnA}) - \eta_{\text{FRET}}(\text{D1A})$ , as a function of  $\Delta_{\text{DD}}$  with the  $\Delta_{\text{DA}}$  value giving the maximum  $\Delta\eta_{\text{FRET}}$  for D20A. The variation curve of  $\Delta\eta_{\text{FRET}}$  with respect to  $\Delta_{\text{DD}}$  was obtained by subtracting the  $\eta_{\text{FRET}}$  of D1A (65.3 % for case (i), 60.1 % for case (ii), 51.5 % for case (iii), and 49.5 % for case (iv)) at the  $\Delta_{\text{DA}}$  value giving the maximum  $\Delta\eta_{\text{FRET}}$  for D20A from  $\eta_{\text{FRET}}$  curve of DnA at the same  $\Delta_{\text{DA}}$ .

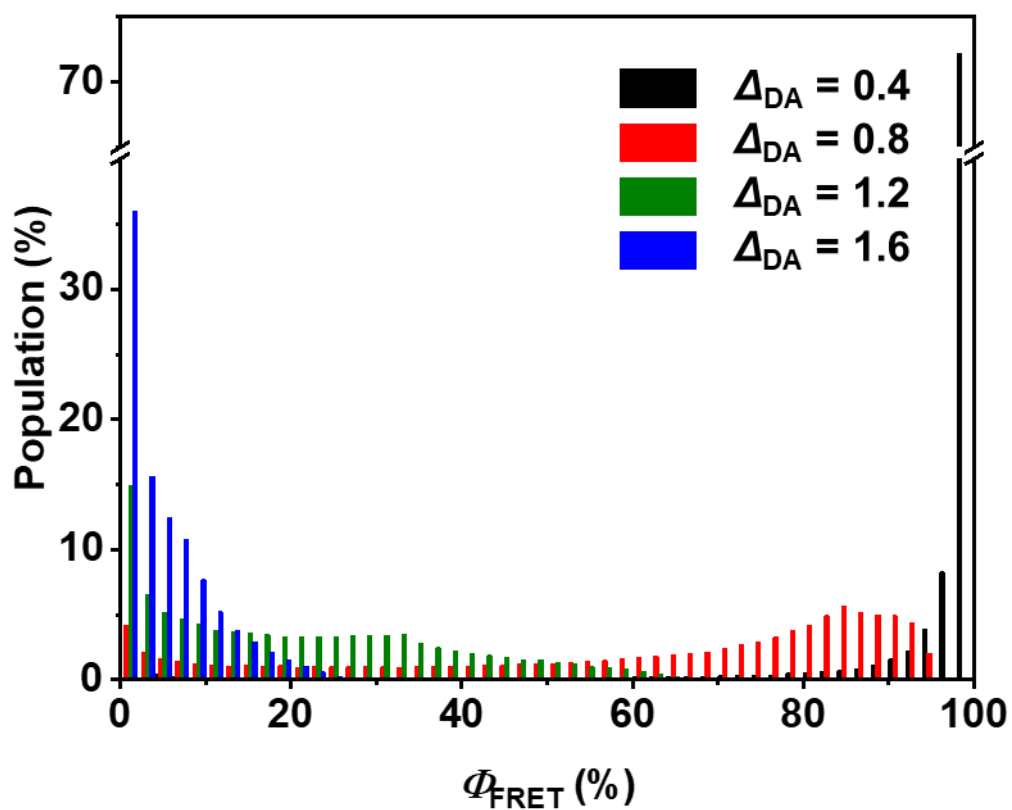

**Figure S15.** Distribution of  $\Phi_{\text{FRET}}$  in case (ii) at  $\Delta_{\text{DA}} = 0.4$  (red), 0.8 (green), 1.2 (blue), and 1.6 (cyan).

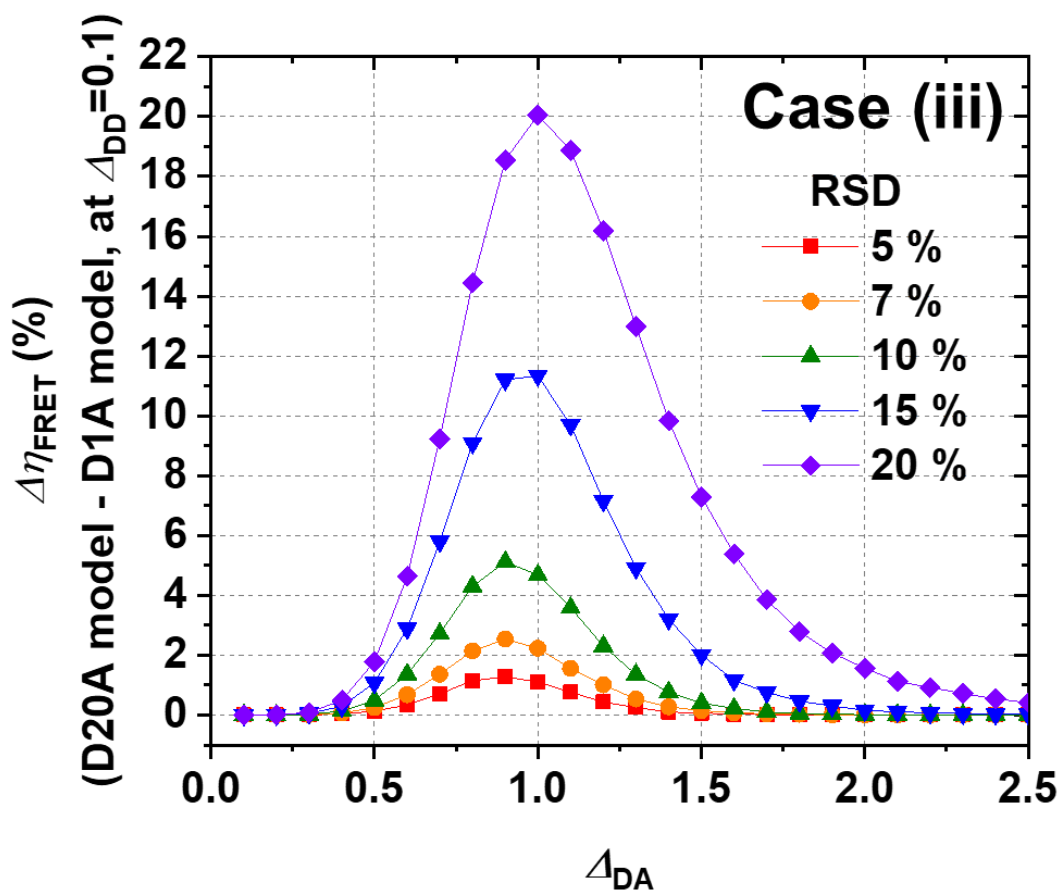

**Figure S16.**  $\Delta\eta_{\text{FRET}}$  of D20A relative to D1A, that is  $\eta_{\text{FRET}}(\text{D20A}) - \eta_{\text{FRET}}(\text{D1A})$ , as a function of  $\Delta_{\text{DA}}$  with the shortest  $\Delta_{\text{DD}} (= 0.1)$  and the relative standard deviation of  $\Delta_{\text{DA}}$  (RSD) = 5 % (red), 7 % (orange), 10 % (green), 15 % (blue), and 20 % (purple) in case (iii). The variation curve of  $\Delta\eta_{\text{FRET}}$  with respect to  $\Delta_{\text{DA}}$  was obtained by subtracting the  $\eta_{\text{FRET}}$  curve of D1A shown in Figure S13 from the  $\eta_{\text{FRET}}$  curve of D20A with  $\Delta_{\text{DD}} = 0.1$ .



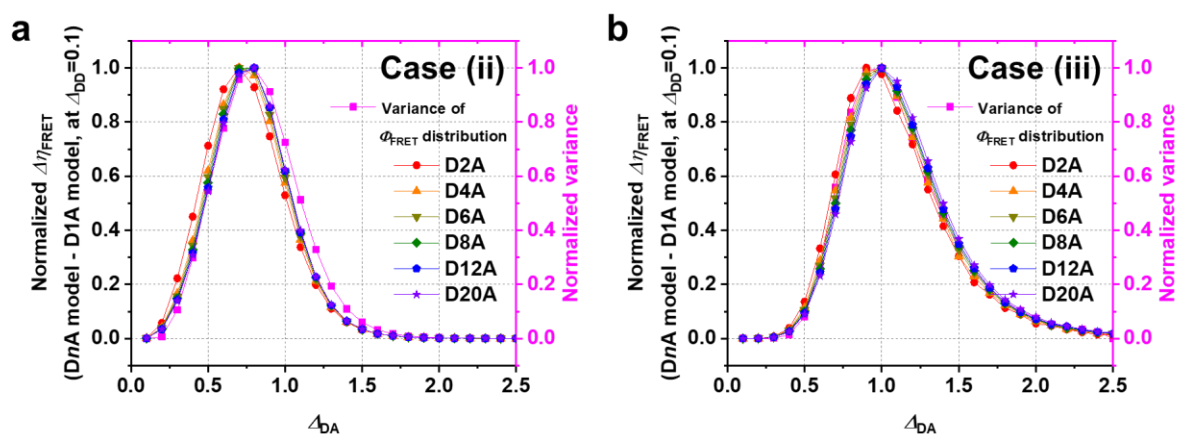

**Figure S17.** Comparison of the width (quantified by variance) of the distribution of  $\phi_{\text{FRET}}$  (magenta) and the normalized  $\Delta\eta_{\text{FRET}}$  of D2A (red), D4A (orange), D6A (dark yellow), D8A (green), D12A (blue), and D20A (purple) relative to D1A for (a) case (ii) and (b) case (iii). It can be seen that  $\Delta\eta_{\text{FRET}}$  and the variance of the distribution of  $\phi_{\text{FRET}}$  are in good agreement with each other, indicating that the  $\Delta\eta_{\text{FRET}}$  value at a given  $\Delta_{\text{DA}}$  is governed by how broad the distribution of  $\phi_{\text{FRET}}$  is.

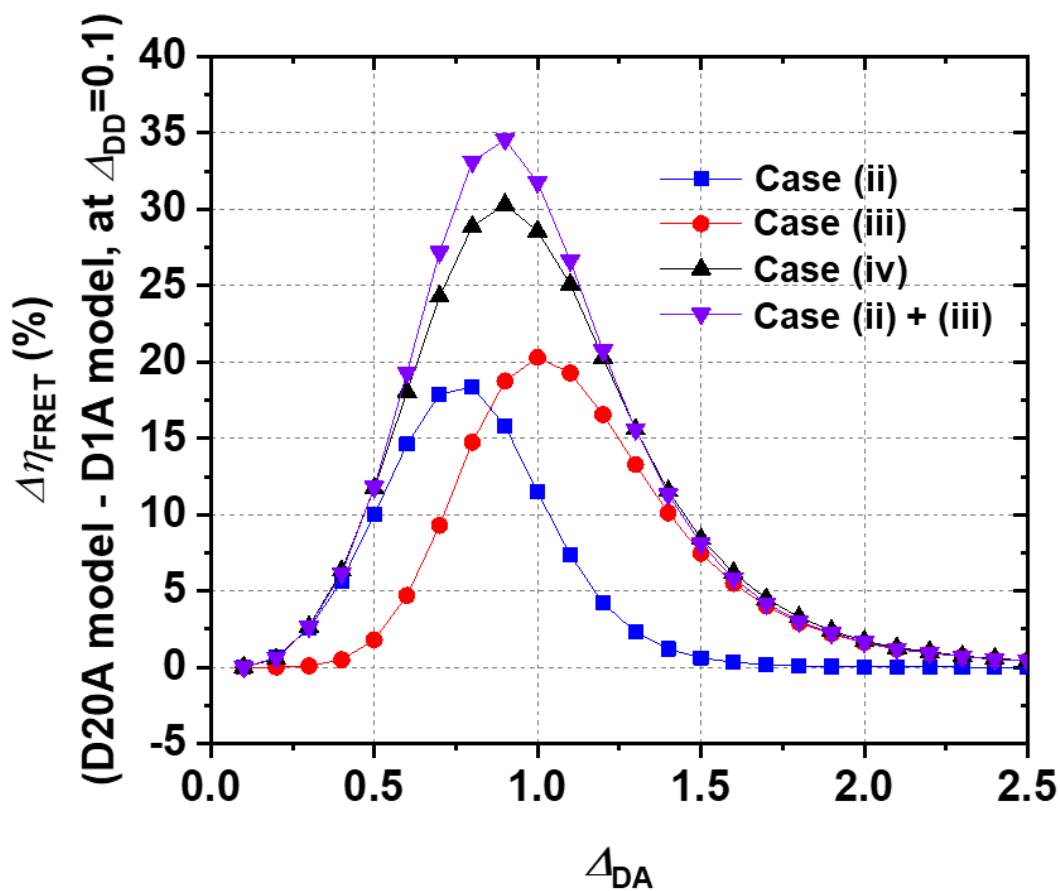

**Figure S18.**  $\Delta\eta_{\text{FRET}}$  of D20A relative to D1A, that is  $\eta_{\text{FRET}}(\text{D20A}) - \eta_{\text{FRET}}(\text{D1A})$ , as a function of  $\Delta_{\text{DA}}$  with the shortest  $\Delta_{\text{DD}}$  ( $= 0.1$ ), for case (ii) (blue), case (iii) (red), and case (iv) (black). The variation curve of  $\Delta\eta_{\text{FRET}}$  with respect to  $\Delta_{\text{DA}}$  was obtained by subtracting the  $\eta_{\text{FRET}}$  curve of D1A shown in Figure S13 from the  $\eta_{\text{FRET}}$  curve of D20A with  $\Delta_{\text{DD}} = 0.1$ . Sum of the  $\Delta\eta_{\text{FRET}}$  curves for case (ii) and (iii) is also shown (purple).

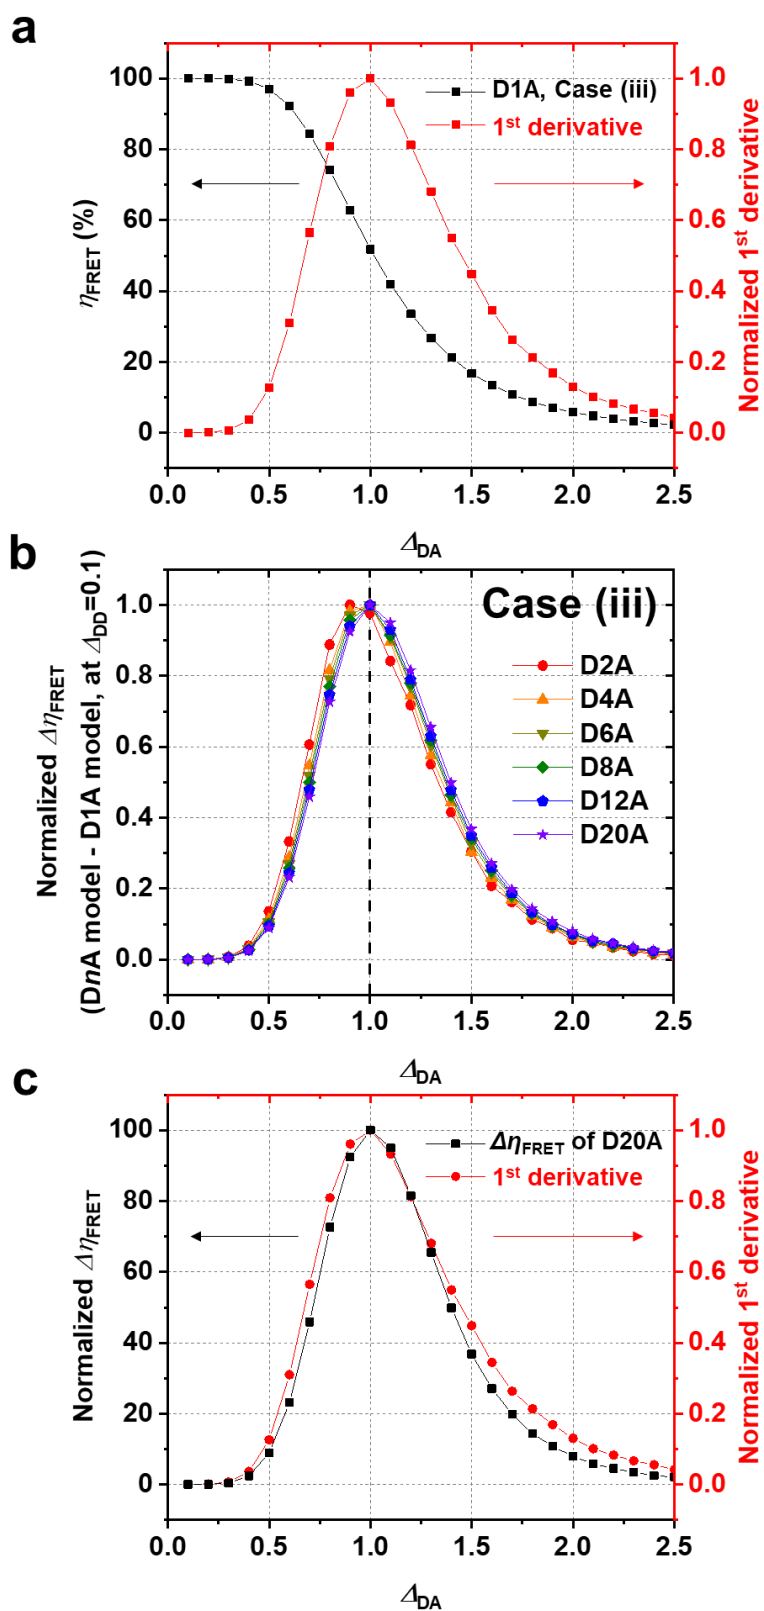

**Figure S19.** (a)  $\Delta_{DA}$  dependence of  $\eta_{FRET}$  (black) and the inverse of the normalized 1st derivative of  $\eta_{FRET}$  with respect to  $\Delta_{DA}$ ,  $-d\eta_{FRET}/d\Delta_{DA}$  (red), of D1A.  $\Delta_{DD}$  was set to be 0.1.

(b)  $\Delta_{DA}$  dependences of the normalized  $\Delta\eta_{\text{FRET}}$ 's of D2A (red), D4A (orange), D6A (dark yellow), D8A (green), D12A (blue), and D20A (purple) relative to D1A.  $\Delta_{DD}$  was set to be 0.1. It can be seen that the normalized  $\Delta\eta_{\text{FRET}}$ 's of all the model MCSs have similar shapes to each other. (c) Comparison of the normalized  $\Delta\eta_{\text{FRET}}$  of D20A (black) and  $-d\eta_{\text{FRET}} / d\Delta_{DA}$  of D1A (red). It can be seen that  $\Delta\eta_{\text{FRET}}$  of D20A and  $-d\eta_{\text{FRET}} / d\Delta_{DA}$  of D1A are in good agreement with each other, indicating that the  $\Delta\eta_{\text{FRET}}$  value at a given  $\Delta_{DA}$  is governed by the slope of  $\eta_{\text{FRET}}$  at the corresponding  $\Delta_{DA}$ . We note that  $d\eta_{\text{FRET}} / d\Delta_{DA}$  of D1A was used for comparison with  $\Delta\eta_{\text{FRET}}$  of D20A to eliminate any effect of homo-FRET on  $\eta_{\text{FRET}}$ .

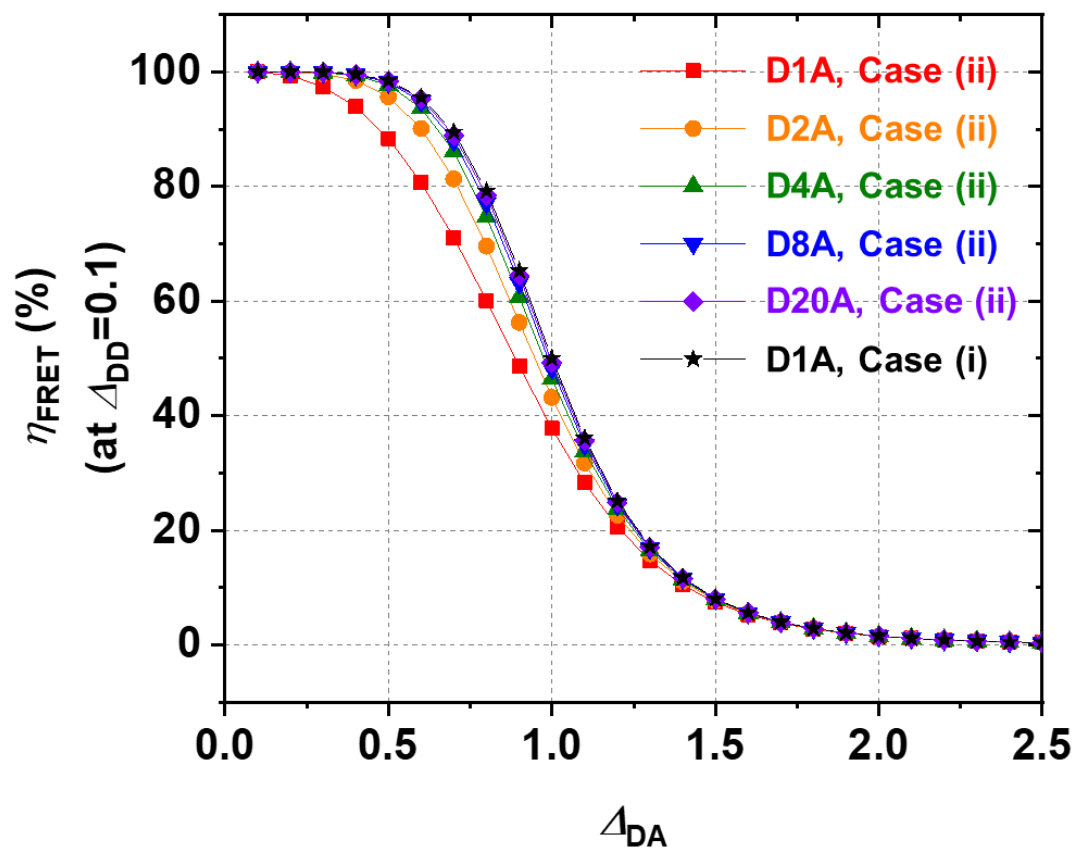

**Figure S20.**  $\eta_{\text{FRET}}$  of D1A (red), D2A (orange), D4A (green), D8A (blue), D20A (purple) in case (ii), and  $\eta_{\text{FRET}}$  of D1A (black) in case (i) as a function of  $\Delta_{\text{DA}}$  at  $\Delta_{\text{DD}} = 0.1$ . As  $n_{\text{D}}$  increases, the  $\eta_{\text{FRET}}$  curve of  $\text{D}n\text{A}$  in case (ii) converges the  $\eta_{\text{FRET}}$  curve of D1A in case (i).

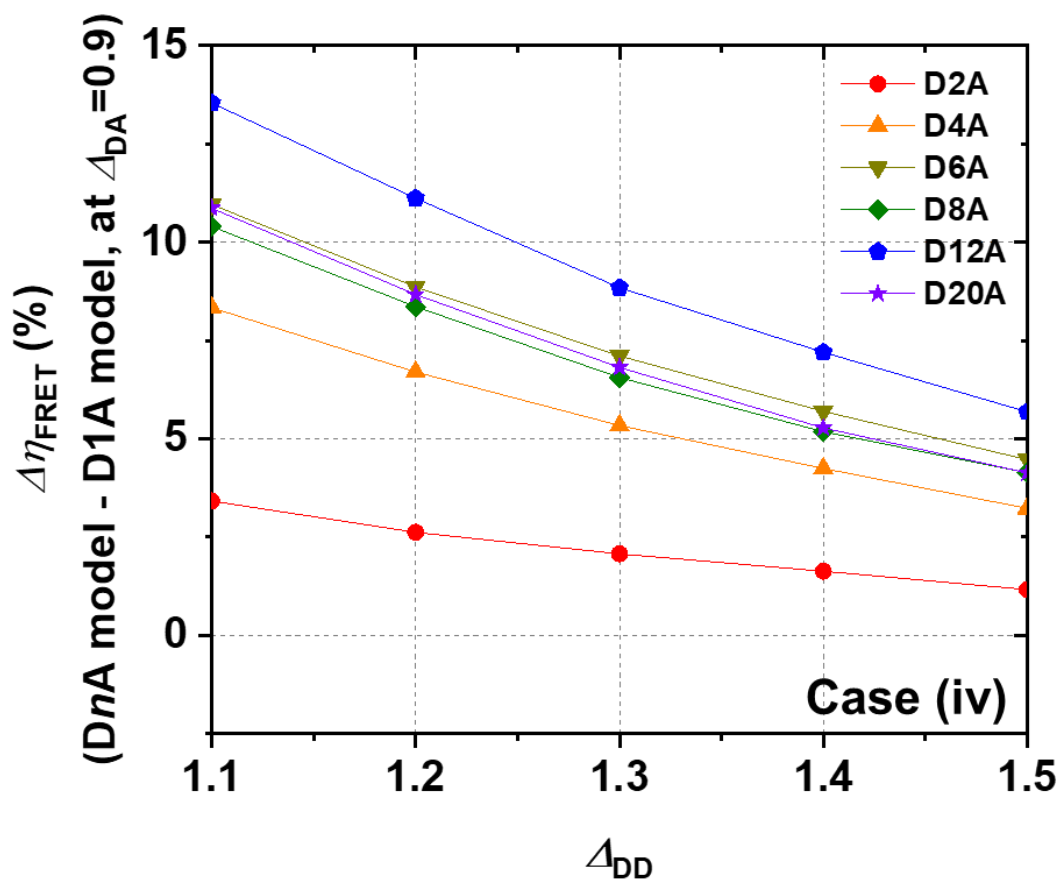

**Figure S21.**  $\Delta\eta_{\text{FRET}}$  of DnA relative to D1A in case (iv), that is  $\eta_{\text{FRET}}(\text{DnA}) - \eta_{\text{FRET}}(\text{D1A})$ , as a function of  $\Delta_{\text{DD}}$  with  $\Delta_{\text{DA}} = 0.9$ . The variation curve of  $\Delta\eta_{\text{FRET}}$  with respect to  $\Delta_{\text{DD}}$  was obtained by subtracting  $\eta_{\text{FRET}}$  of D1A at  $\Delta_{\text{DA}} = 0.9$  (49.5 %) from the  $\eta_{\text{FRET}}$  curve of DnA at the same  $\Delta_{\text{DA}}$ .

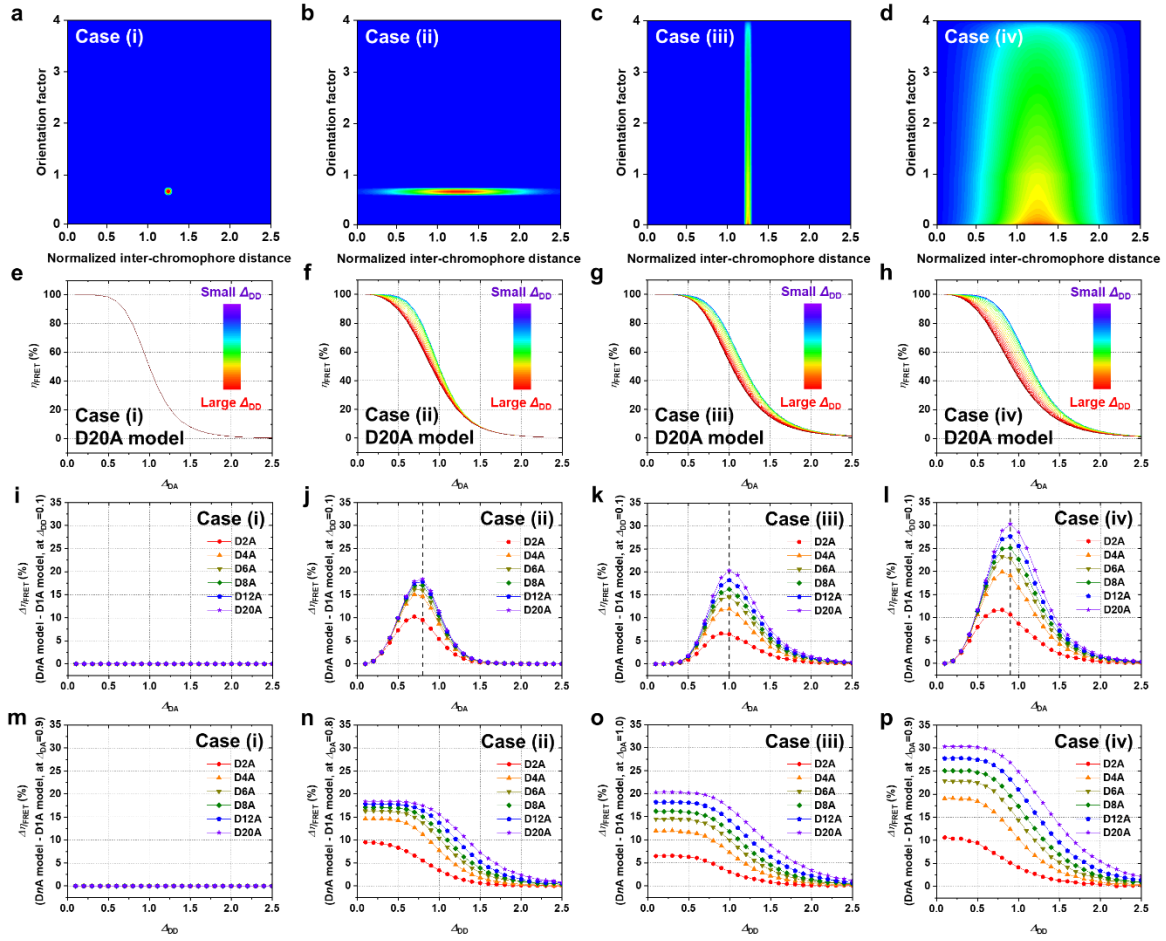

**Figure S22.** Simulation for calculating  $\eta_{\text{FRET}}$  in model MCSs with  $n_{\text{ND}}$  set to be equal to  $n_{\text{D}}$ . (a - d) Schematic of distributions of the inter-chromophore distances and the orientation factor in the four cases used in our simulations. The distributions are shown in the form of heatmaps where blue and red indicate the lowest and highest values. (e - h)  $\eta_{\text{FRET}}$  of D20A as a function of  $\Delta_{\text{DA}}$  with various  $\Delta_{\text{DD}}$  values.  $\eta_{\text{FRET}}$  was calculated from simulations with given values of  $\Delta_{\text{DA}}$ ,  $\Delta_{\text{DD}}$ , and  $\kappa^2$ .  $\eta_{\text{FRET}}$  curves for various  $\Delta_{\text{DD}}$  values are plotted following a rainbow color scheme, from red (the largest  $\Delta_{\text{DD}}$ ) to purple (the smallest  $\Delta_{\text{DD}}$ ). (i - l)  $\Delta\eta_{\text{FRET}}$  of DnA relative to D1A, that is  $\eta_{\text{FRET}}(\text{DnA}) - \eta_{\text{FRET}}(\text{D1A})$ , as a function of  $\Delta_{\text{DA}}$  with the shortest  $\Delta_{\text{DD}} (= 0.1)$ , for  $n = 2$  (red), 4 (orange), 6 (dark yellow), 8 (green), 12 (blue), and 20 (violet) models. The variation curve of  $\Delta\eta_{\text{FRET}}$  with respect to  $\Delta_{\text{DA}}$  was obtained by subtracting the  $\eta_{\text{FRET}}$  curve of

D1A shown in Figure S13 from the  $\eta_{\text{FRET}}$  curve of DnA with  $\Delta_{\text{DD}} = 0.1$ . (m - p)  $\Delta\eta_{\text{FRET}}$  of DnA and D1A, that is  $\eta_{\text{FRET}}(\text{DnA}) - \eta_{\text{FRET}}(\text{D1A})$ , as a function of  $\Delta_{\text{DD}}$  with the  $\Delta_{\text{DA}}$  value giving the maximum  $\Delta\eta_{\text{FRET}}$  for D20A. The variation curve of  $\Delta\eta_{\text{FRET}}$  with respect to  $\Delta_{\text{DD}}$  was obtained by subtracting the  $\eta_{\text{FRET}}$  of D1A (65.3 % for case (i), 60.1 % for case (ii), 51.5 % for case (iii), and 49.5 % for case (iv)) at the  $\Delta_{\text{DA}}$  value giving the maximum  $\Delta\eta_{\text{FRET}}$  for D20A from  $\eta_{\text{FRET}}$  curve of DnA at the same  $\Delta_{\text{DA}}$ . We note that figures in second and fourth columns differ from the figures in Figure S14 in the same positions.
